# Supplementary material for: Design, synthesis, biological evaluation and molecular docking studies of quinoline-anthranilic acid hybrids as potent anti-inflammatory drugs
Source: Royal Society of Chemistry journal article supplement (doi:10.1039/d4ob00040d), 2024-01-01
Supplement: d4ob00040d1.pdf [file d4ob00040d1.pdf]

## Supplementary Information (SI)

### *Design, Synthesis, Biological Evaluation and Molecular Docking Studies of Quinoline-Anthranilic Acid Hybrids as Potent Anti-Inflammatory Drugs*

Sidra Siddique,<sup>1</sup> Khalid Hussain,<sup>1,2\*</sup> Naureen Shehzadi,<sup>1</sup> Muhammad Arshad,<sup>3\*</sup> Muhammad Nadeem Arshad,<sup>4</sup> Sadaf Iftikhar,<sup>5</sup> Farhat Saghir,<sup>1,2</sup> Ayisha Shaukat,<sup>1</sup> Muhammad Sarfraz,<sup>3</sup> Nisar Ahmed<sup>6\*</sup>

<sup>1</sup>Punjab University College of Pharmacy, University of the Punjab, Allama Iqbal Campus, Lahore, Pakistan.

<sup>2</sup>Faculty of Pharmacy, The University of Lahore, Lahore, Pakistan.

<sup>3</sup>Institute of Chemistry, The Islamia University of Bahawalpur, Bahawalpur- 63100, Pakistan.

<sup>4</sup>Chemistry Department, Faculty of Science, and Center of Excellence for Advanced Material Research, King Abdulaziz University, Jeddah 21589, P.O. Box 80203, Saudi Arabia.

<sup>5</sup>Department of Pharmacy, University of South Asia, Lahore, Pakistan

<sup>6</sup>School of Chemistry, Cardiff University, Main Building, Park Place, Cardiff, CF10 3AT, UK.

**\*Corresponding Author's Email:**

khalid.hussain@pharm.uol.edu.pk (K.H.)

muhammad.arshad@iub.edu.pk (M.A.)

AhmedN14@cardiff.ac.uk (N.A.)

## Table of Contents

|       |                                                                                                         |    |
|-------|---------------------------------------------------------------------------------------------------------|----|
| 1     | Materials and General Methods .....                                                                     | 3  |
| 1.1.  | Glassware, Solvents and Reagents .....                                                                  | 3  |
| 1.2.  | Chromatography and Instrumentation .....                                                                | 3  |
| 1.3.  | Naming of Compounds .....                                                                               | 4  |
| 2     | Druglikeness studies.....                                                                               | 4  |
| 3     | Molecular docking studies.....                                                                          | 6  |
| 4     | Experimental Data .....                                                                                 | 15 |
| 4.1   | Synthesis of Compounds.....                                                                             | 15 |
| 4.1.1 | Synthesis of acetamides (L/T/A) <sup>1</sup> .....                                                      | 15 |
| 4.1.2 | Synthesis of 1(a-c) <sup>3</sup> .....                                                                  | 15 |
| 5     | Spectroscopic Data .....                                                                                | 17 |
| 5.1   | <sup>1</sup> H NMR (CDCl <sub>3</sub> , 600 MHz) of 2-Chloroquinoline-3-carbaldehyde (1a) .....         | 17 |
| 5.2   | <sup>13</sup> C NMR (CDCl <sub>3</sub> , 150 MHz) of 2-Chloroquinoline-3-carbaldehyde (1a) .....        | 18 |
| 5.3   | DEPT-135 NMR (CDCl <sub>3</sub> , 150 MHz) of 2-Chloroquinoline-3-carbaldehyde (1a) .....               | 19 |
| 5.4   | <sup>1</sup> H NMR (CDCl <sub>3</sub> , 600 MHz) of 2-Chloro-6-methylquinoline-3-carbaldehyde 1b .....  | 20 |
| 5.5   | <sup>13</sup> C NMR (CDCl <sub>3</sub> , 150 MHz) of 2-Chloro-6-methylquinoline-3-carbaldehyde 1b ..... | 21 |
| 5.6   | DEPT-135 NMR (CDCl <sub>3</sub> , 150 MHz) of 2-Chloro-6-methylquinoline-3-carbaldehyde 1b<br>22        |    |
| 5.7   | <sup>1</sup> H NMR (CDCl <sub>3</sub> , 600 MHz) of (2-Chloroquinolin-3-yl)methanol (2a) .....          | 22 |
| 5.8   | <sup>13</sup> C NMR (CDCl <sub>3</sub> , 150 MHz) of (2-Chloroquinolin-3-yl)methanol (2a).....          | 24 |
| 5.9   | DEPT-135 NMR (CDCl <sub>3</sub> , 150 MHz) of (2-Chloroquinolin-3-yl)methanol (2a).....                 | 25 |
| 5.10  | <sup>1</sup> H NMR (DMSO, 600 MHz) of (2-Chloro-6-methylquinolin-3-yl)methanol (2b).....                | 26 |
| 5.11  | <sup>13</sup> C NMR (DMSO, 150 MHz) of (2-Chloro-6-methylquinolin-3-yl)methanol (2b).....               | 27 |
| 5.12  | DEPT-135 NMR (DMSO, 150 MHz) of (2-Chloro-6-methylquinolin-3-yl)methanol<br>(2b) 29                     |    |

|      |                                                                                                                  |    |
|------|------------------------------------------------------------------------------------------------------------------|----|
| 5.13 | <sup>1</sup> H NMR (CDCl <sub>3</sub> , 400 MHz) of (2-Chloroquinolin-3-yl)methyl 2-aminobenzoate (5a)           | 30 |
| 5.14 | <sup>13</sup> C NMR (CDCl <sub>3</sub> , 400 MHz) of (2-chloroquinolin-3-yl)methyl-2-aminobenzoate (5a)          | 31 |
| 5.15 | <sup>1</sup> H NMR (CDCl <sub>3</sub> , 400 MHz) of (2-Chloro-6-methylquinolin-3-yl)methyl 2-aminobenzoate (5b)  | 32 |
| 5.16 | <sup>13</sup> C NMR (CDCl <sub>3</sub> , 100 MHz) of (2-Chloro-6-methylquinolin-3-yl)methyl 2-aminobenzoate (5b) | 33 |
| 5.17 | <sup>1</sup> H NMR (300 MHz, DMSO) of (2-Chloro-6-methoxyquinolin-3-yl)methyl-2-aminobenzoate (5c)               | 34 |
| 5.18 | <sup>13</sup> C NMR (75 MHz, DMSO) of (2-chloro-6-methoxyquinolin-3-yl)methyl-2-aminobenzoate (5c)               | 36 |
| 6    | X-Ray Crystallography Data (XRD)                                                                                 | 37 |
| 7    | References                                                                                                       | 38 |

## 1 Materials and General Methods

### 1.1. Glassware, Solvents and Reagents

All manipulations were performed with oven-dried (110 °C for a minimum of 12 h) dried glassware. All solvents were commercially supplied or distilled before use (MeOH, DMF, MeCN, CH<sub>2</sub>Cl<sub>2</sub>). Reagents were purchased from commercial sources and used as received.

### 1.2. Chromatography and Instrumentation

**Thin layer chromatography** (TLC) was performed using Merck Kieselgel 60 F254 fluorescent treated silica, which was visualized under UV light, or by staining with aqueous basic potassium permanganate (KMnO<sub>4</sub>) followed by heating.

**Flash column chromatography** (FCC) was carried out using Merk silica gel (60 Å, 230–400 mesh, 40–63 μm) using a suitable mobile phase as stated.

**NMR spectra** were recorded at various field strengths, as indicated, using Bruker 300 MHz, 400 MHz, and 600 MHz for <sup>1</sup>H and <sup>13</sup>C acquisitions. All NMR spectra were recorded at 25 °C unless otherwise stated. Chemical shifts (δ) are reported in parts per million (ppm) and referenced CDCl<sub>3</sub> (<sup>1</sup>H: 7.26 ppm; <sup>13</sup>C: 77.10 ppm) or DMSO-*d*<sub>6</sub> (<sup>1</sup>H: 2.50 ppm; <sup>13</sup>C: 39.52 ppm). Coupling constants

(*J*) are given in Hertz (Hz) and refer to apparent multiplicities (s = singlet, d = doublet, t = triplet, m = multiplet, br = broad signal, dd = doublet of doublets, etc.). The <sup>1</sup>H NMR spectra are reported as follows: chemical shift (multiplicity, coupling constants, number of protons). <sup>13</sup>C NMR values are reported up to one decimal after rounding off the second decimal digit.

**X-ray Crystallography (XRD)** was performed using Bruker D8 Venture with PHOTON II detector and Mo microfocus source ( $\lambda = 0.71073 \text{ \AA}$ ) were used for the present study.

**IR spectra** were recorded neat (ATR sampling) on Agilent FT-IR spectrophotometer. Selected absorption maxima ( $\nu_{\text{max}}$ ) are reported in wavenumbers ( $\text{cm}^{-1}$ ).

**For In vitro Bioactivities**, thermostatic water bath (M-270, Memmert, Germany), centrifuge machine (80-2 electronic centrifuge), pH meter (Schott gerate, Germany) double beam UV spectrophotometer (UV-2550, Shimadzu Corporation, Japan) were used.

### 1.3. Naming of Compounds

Compound names are those generated by ChemDraw Professional 20.0 software (PerkinElmer), following the IUPAC nomenclature.

## 2 Druglikeness studies

**Table S1.** Physicochemical, drug-likeness, pharmacokinetic, and toxicity predictions of compound **5a-c**

| Parameter                         | Compound<br>5a | Compound<br>5b | Compound<br>5c | Software  |
|-----------------------------------|----------------|----------------|----------------|-----------|
| <b>Physicochemical properties</b> |                |                |                |           |
| MW (Molecular weight)<br>g/mol    | 312.75         | 326.78         | 342.78         | swissADME |
| No. of heavy atoms                | 22             | 23             | 24             | swissADME |
| No. of RB (rotatable bonds)       | 4              | 4              | 5              | swissADME |
| No. of aromatic heavy atoms       | 16             | 16             | 16             | swissADME |
| HBA (Hydrogen bond<br>acceptors)  | 3              | 3              | 4              | swissADME |
| Fraction Csp <sup>3</sup>         | 0.06           | 0.11           | 0.11           | swissADME |
| TPSA ( $\text{\AA}^2$ )           | 65.21          | 65.21          | 74.44          | swissADME |
| MR (Molar Refractivity)           | 86.92          | 91.89          | 93.42          | swissADME |
| Consensus Log Po/w                | 3.45           | 3.82           | 3.5            | swissADME |
| Pure water solubility (mg/L)      | 3.54           | 1.099          | 2.53           | preADMET  |
| Water solubility class            | Moderate       | Moderate       | Moderate       | swissADME |

|                                    |           |           |           |           |
|------------------------------------|-----------|-----------|-----------|-----------|
| Buffer solubility (mg/L)           | 28.53     | 12.16     | 16.21     | preADMET  |
| <b>Absorption</b>                  |           |           |           |           |
| HIA                                | 96.48     | 96.54     | 96.64     | preADMET  |
|                                    | High      | High      | High      | swissADME |
| Caco2 (permeability in nm/sec)     | 21.31     | 21.62     | 21.37     | preADMET  |
| MDCK (permeability in nm/sec)      | 7.38      | 0.32      | 1.11      | preADMET  |
| Skin Penetrability (log Kp cm/sec) | -5.11     | -4.94     | -5.31     | swissADME |
|                                    | -3.08     | -3.01     | -3.26     | preADMET  |
| <b>Distribution</b>                |           |           |           |           |
| BBB (blood brain barrier)          | Yes       | Yes       | Yes       | swissADME |
|                                    | 0.57      | 0.16      | 0.31      | preADMET  |
| PPB (Plasma Protein Binding)       | 89.83     | 88.24     | 87.30     | preADMET  |
| P-gp substrate                     | No        | No        | No        | swissADME |
| P-gpinhibition                     | Inhibitor | Inhibitor | Inhibitor | preADMET  |
| <b>Metabolism</b>                  |           |           |           |           |
| CYP3A4 substrate                   | Weakly    | Weakly    | Weakly    | preADMET  |
| CYP2D6 substrate                   | None      | None      | None      | preADMET  |
| CYP2C19 inhibition                 | Yes       | Yes       | Yes       | Both      |
| CYP2C9 inhibition                  | Yes       | Yes       | Yes       | Both      |
| CYP2D6 inhibition                  | yes       | Yes       | yes       | swissADME |
|                                    | None      | None      | None      | preADMET  |
| CYP1A2 inhibitor                   | Yes       | Yes       | Yes       | swissADME |
| CYP3A4 inhibition                  | Yes       | Yes       | Yes       | Both      |

**HIA:** human intestinal absorption, **Caco2:** cells which originate from human colon adenocarcinoma,

**MDCK:** madin–darby canine kidney, **p-gp:** p glycoprotein, an efflux protein

**Table S2.** Medicinal Chemistry, and toxicity of hybrids

|                            |             |             |             |           |
|----------------------------|-------------|-------------|-------------|-----------|
| <b>Medicinal Chemistry</b> |             |             |             |           |
| PAINS                      | 0 alert     | 0 alert     | 0 alert     | swissADME |
| Brenk                      | 2 alerts    | 2 alerts    | 2 alerts    | swissADME |
| Leadlikeness               | No          | No          | No          | swissADME |
| Synthetic accessibility    | 2.25        | 2.37        | 2.35        | swissADME |
| <b>Toxicity</b>            |             |             |             |           |
| AMES test                  | Mutagen     | Mutagen     | Mutagen     | preADMET  |
| Carcinogenicity (Mouse)    | Negative    | Negative    | Negative    | preADMET  |
| Carcinogenicity (Rat)      | Negative    | Negative    | Negative    | preADMET  |
| Inhibition of HERG         | Medium risk | Medium risk | Medium risk | preADMET  |
| TA100(10RLI)               | Positive    | Positive    | Positive    | preADMET  |
| TA100(NA)                  | Negative    | Negative    | Positive    | preADMET  |
| TA1535(10RLI)              | Negative    | Negative    | Negative    | preADMET  |

### 3 Molecular docking studies

protein- native ligand complex (in pdb)

**A –UTJ (TNF- $\alpha$ )**

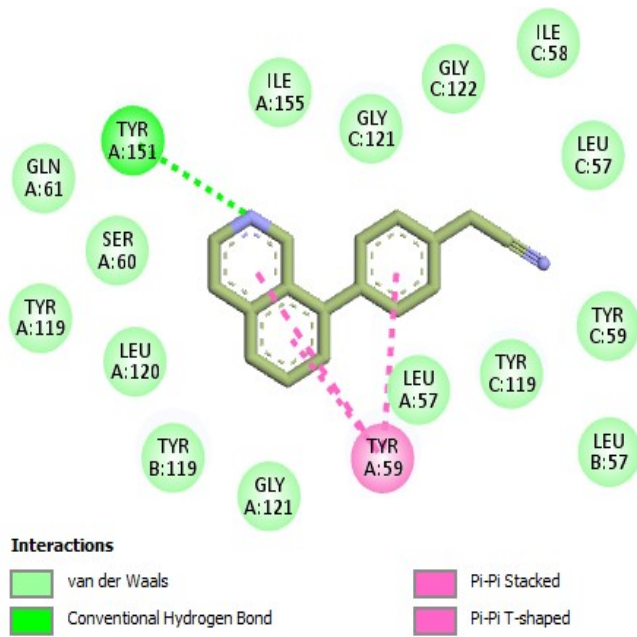

protein- native ligand complex (redocked)

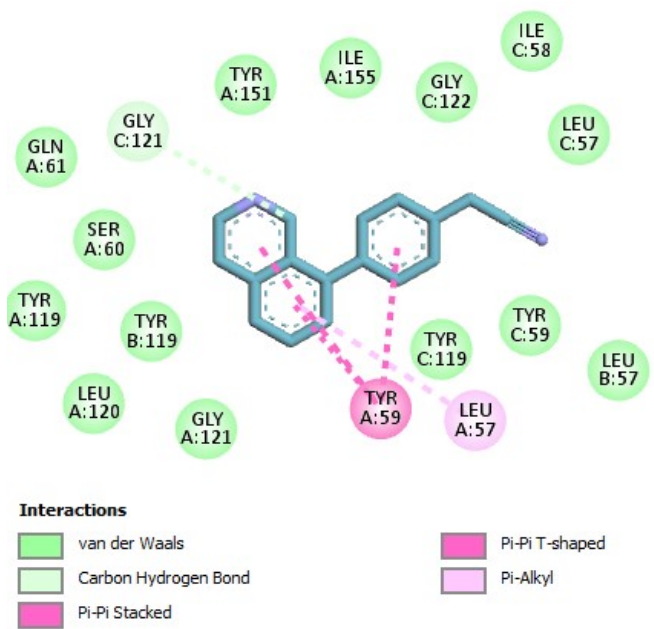

**B -QY 1 (FLAP)**

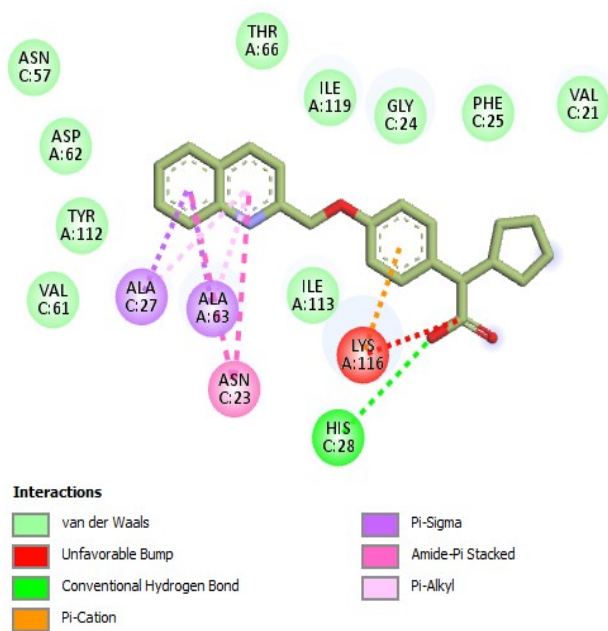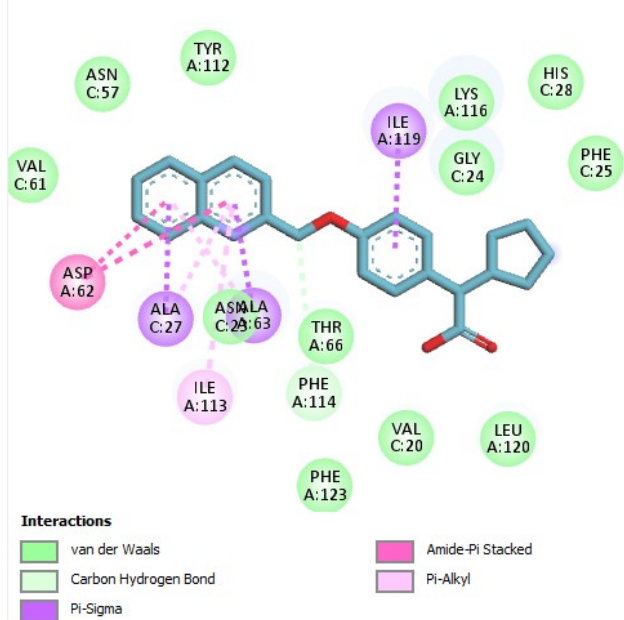

### C-ACD (COX-II)

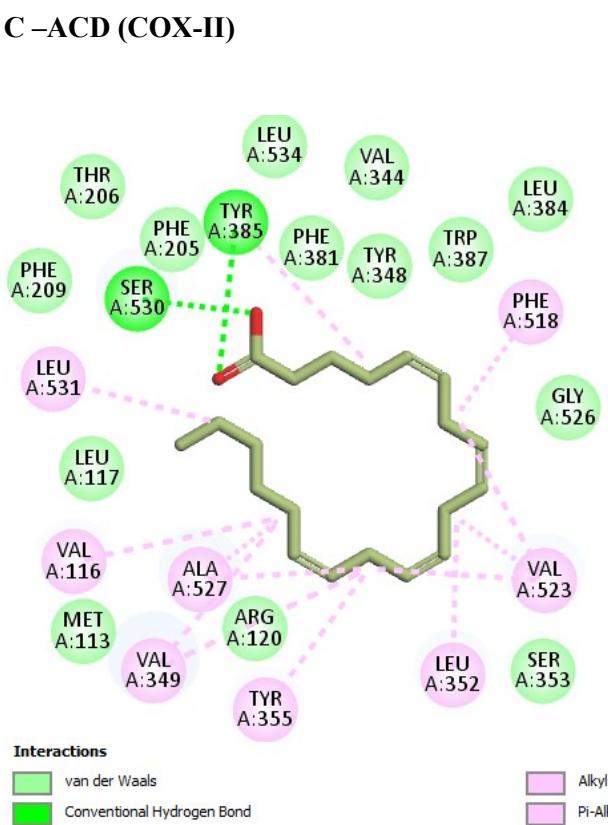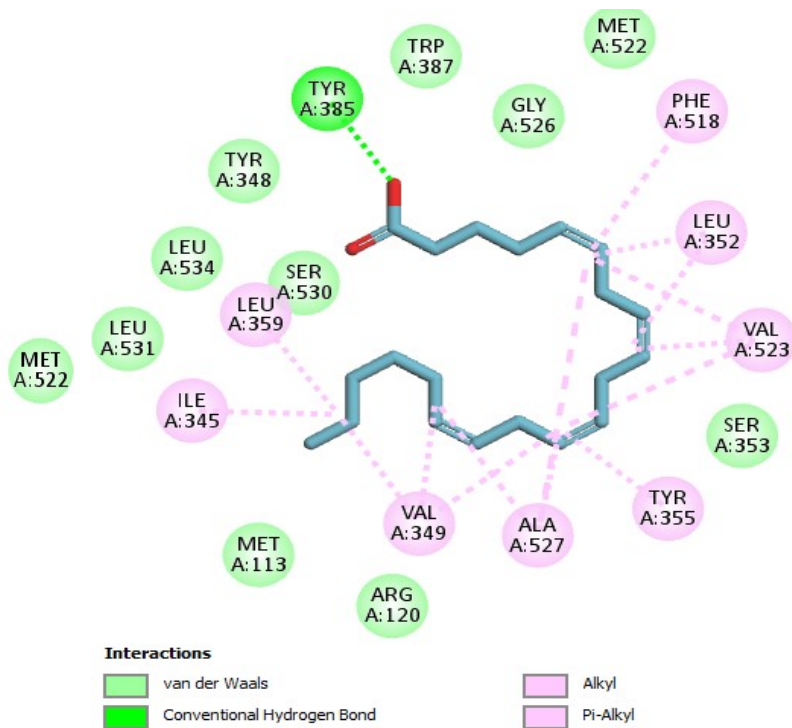

Figure.S1. comparison of native ligand with redocked native ligand

A

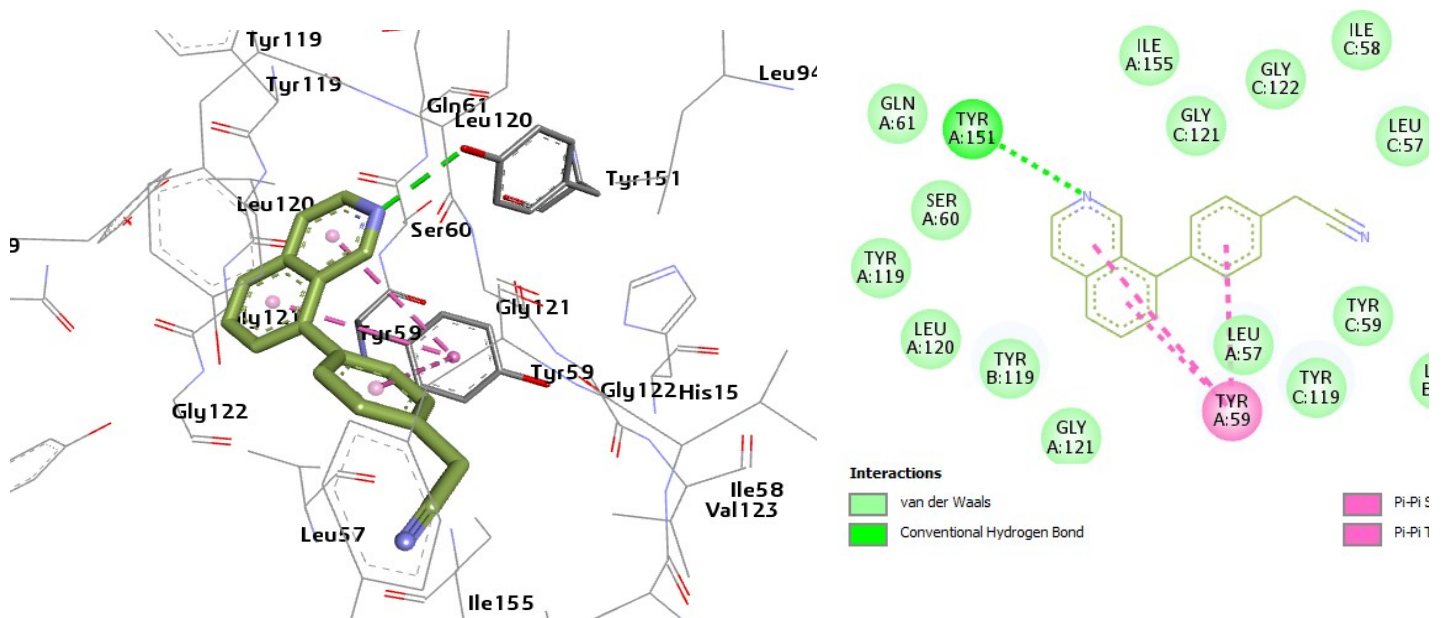

B

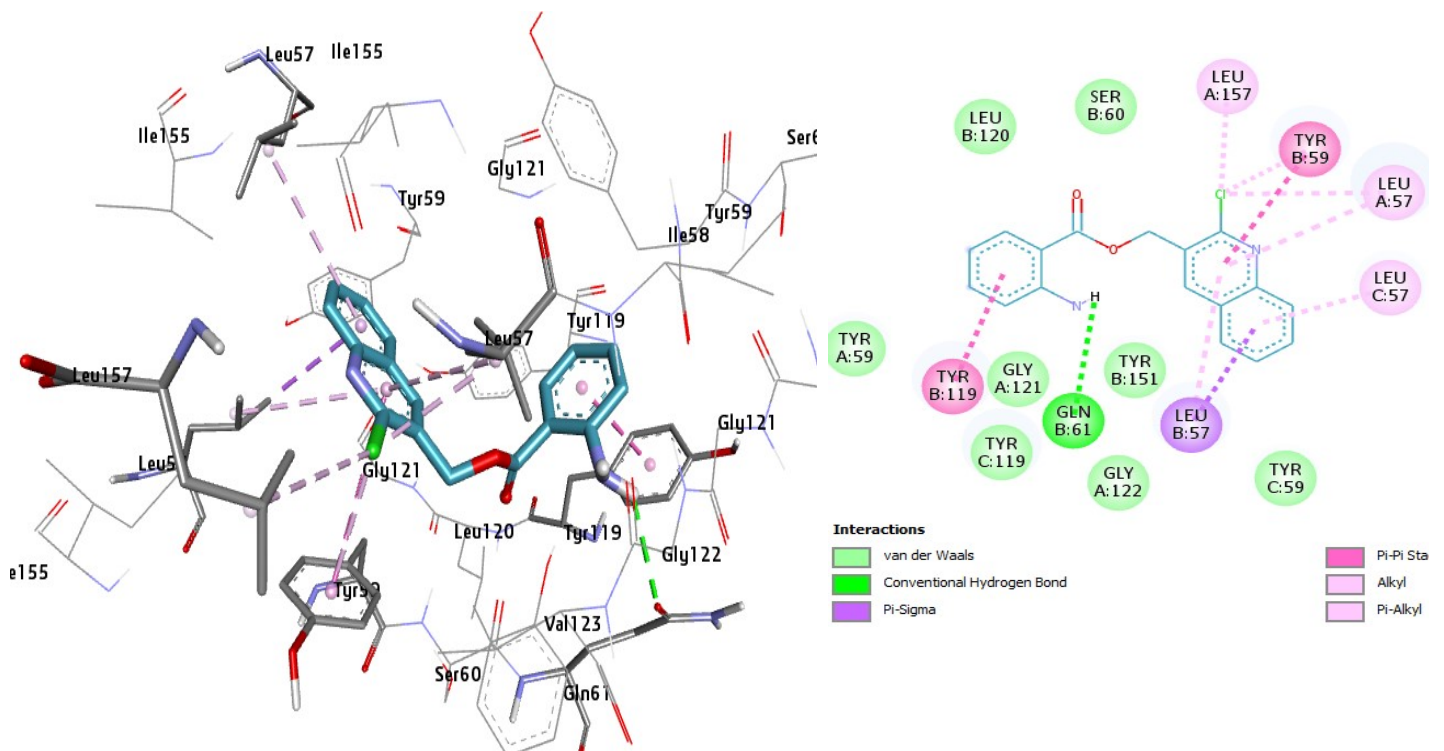



C

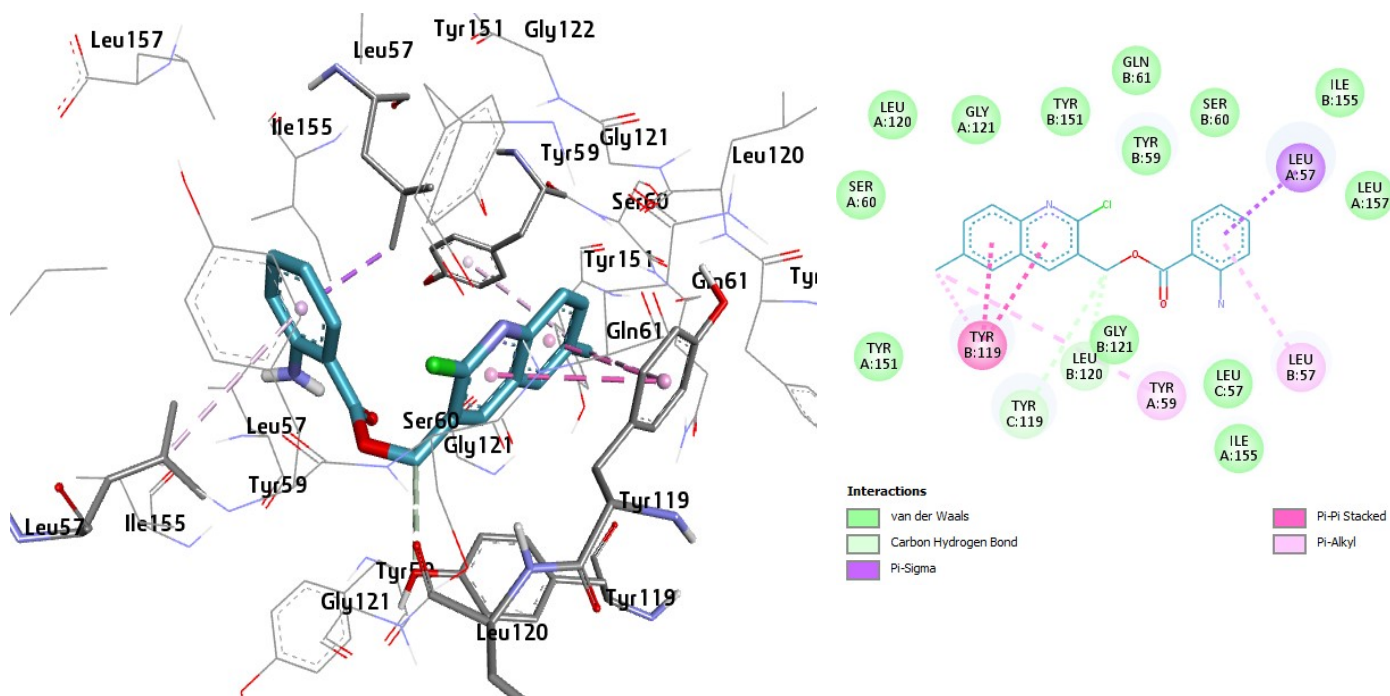

D

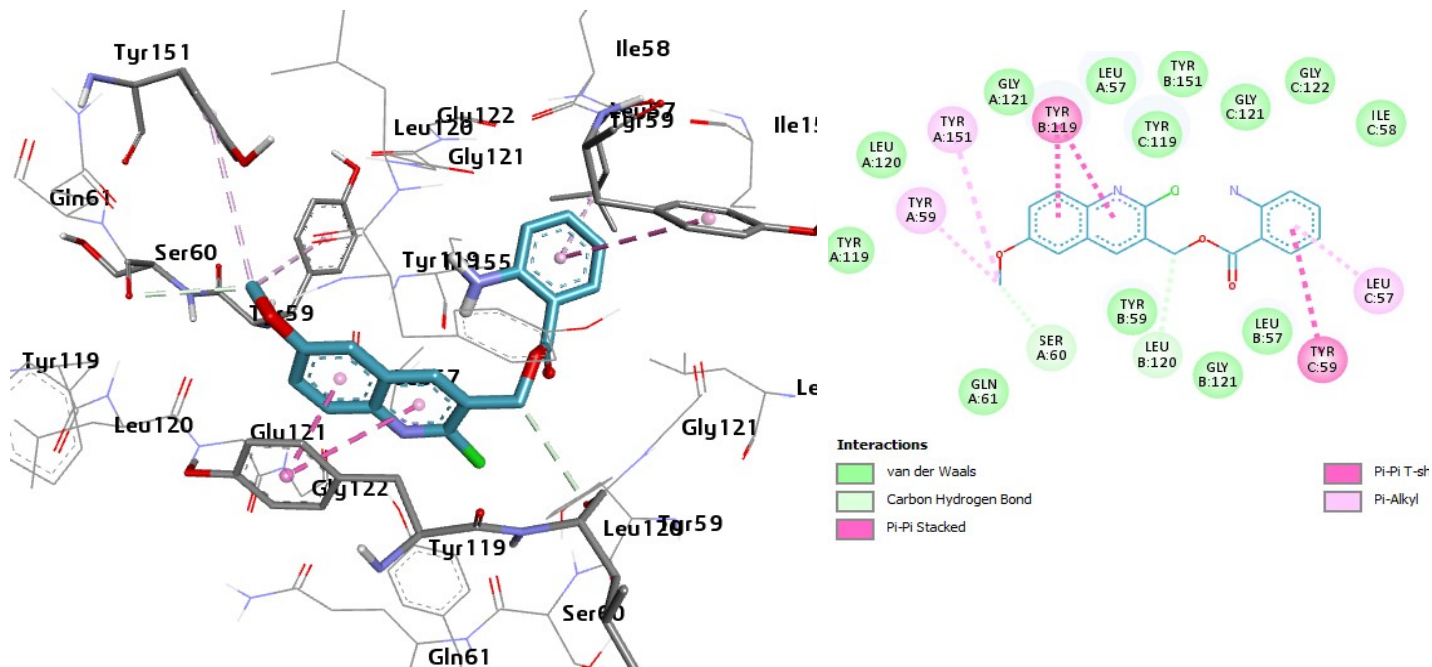

**Figure S2.** 3D and 2D images of ligand UTJ (A), 5a (B), 5b (C), and 5c (D) docked with Tumor necrosis factor (TNF- $\alpha$ )

A

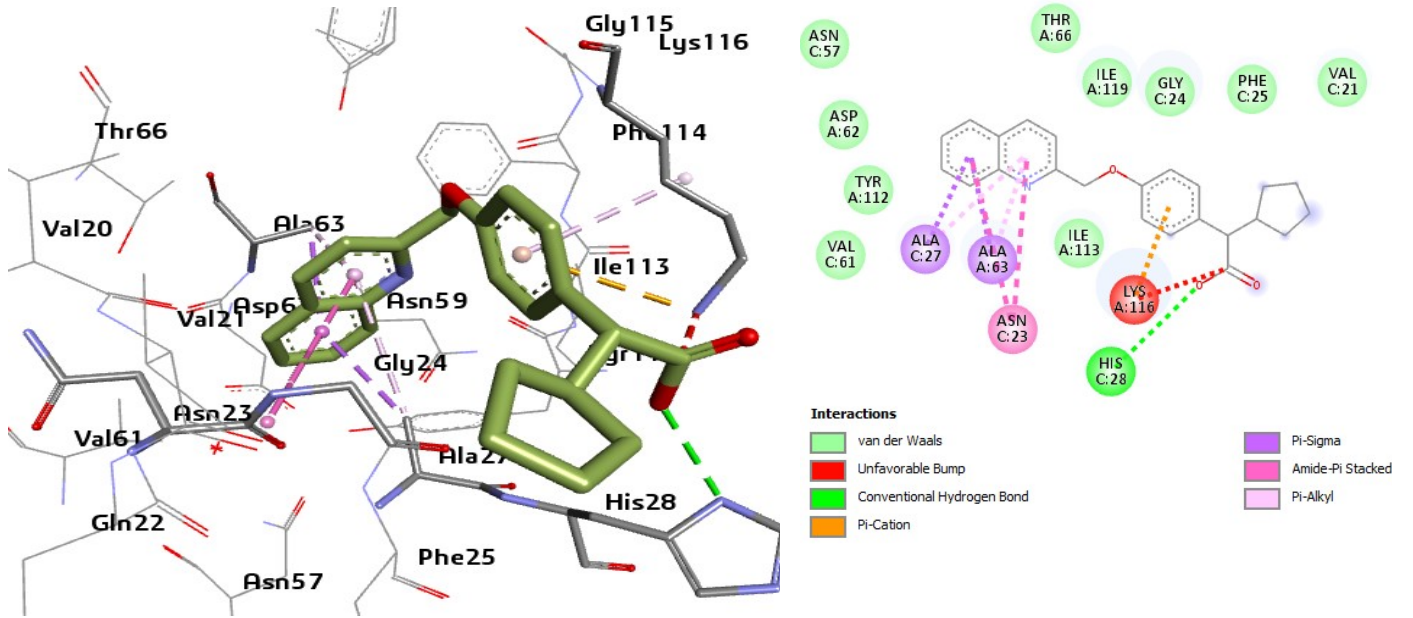

B

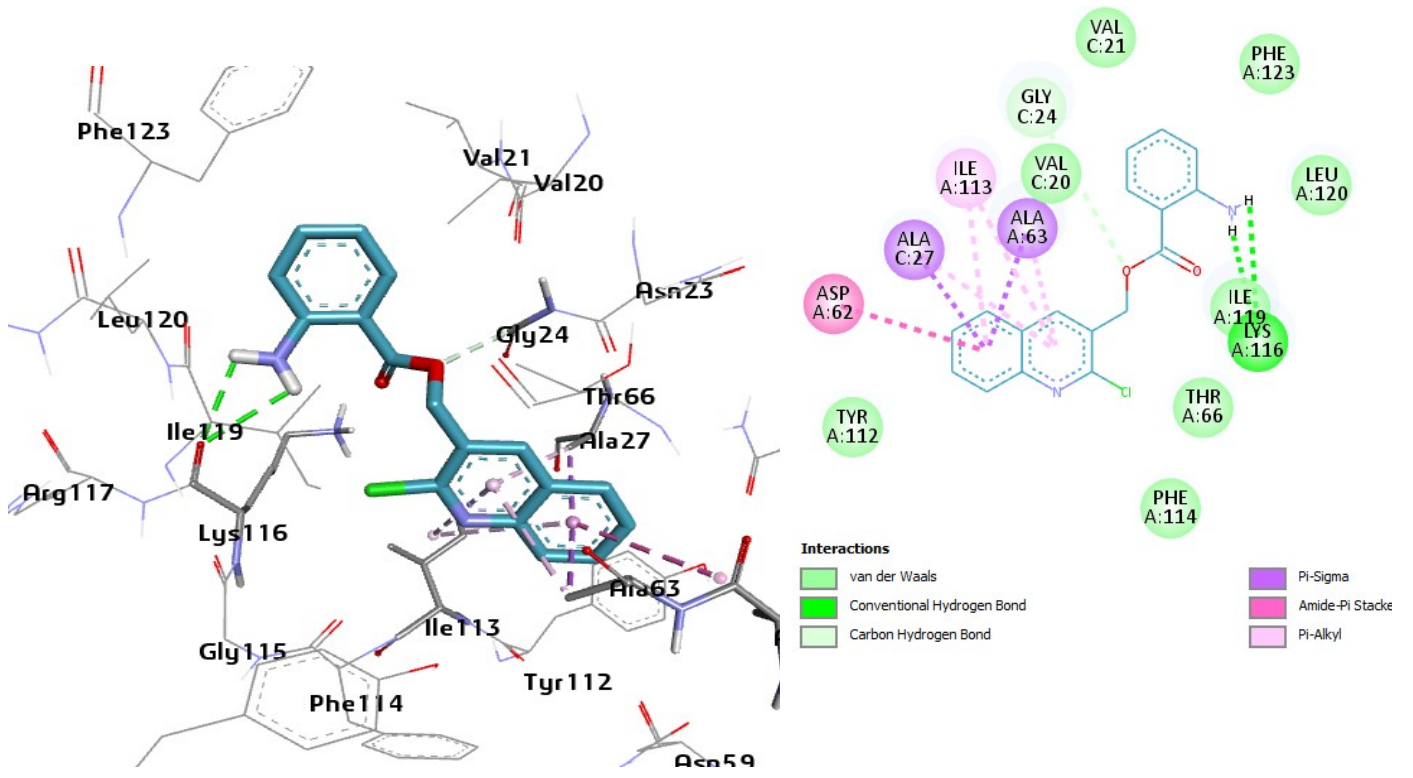

C

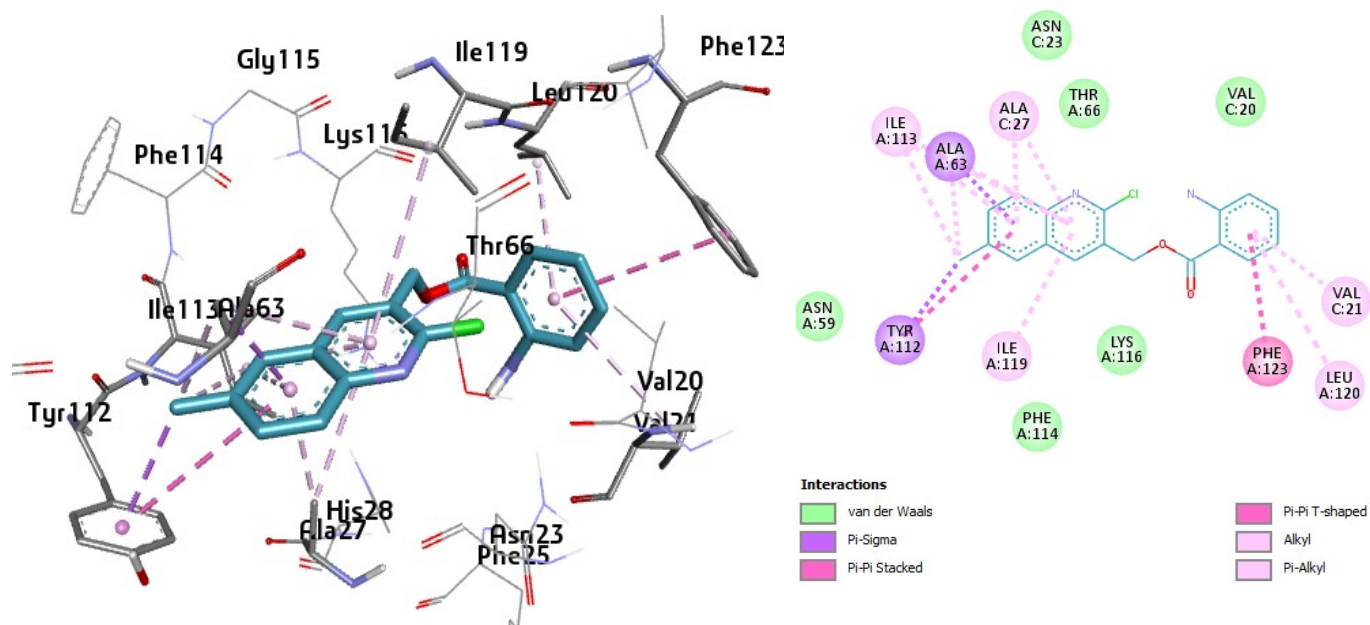

D

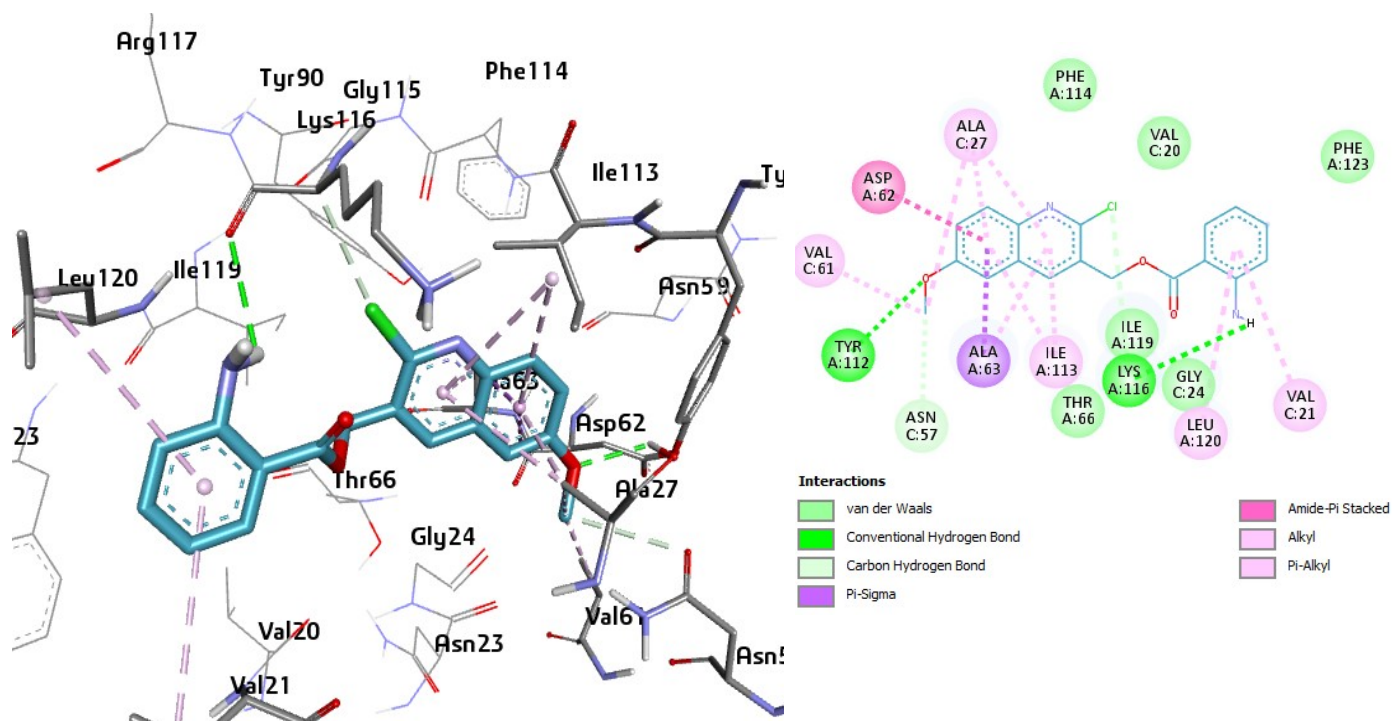

**Figure S3.** 3D and 2D image of ligand QY1 (A), 5a (B), 5b (C) and 5c (D) docked with 5-Lipoxygenase activating protein (FLAP)

A

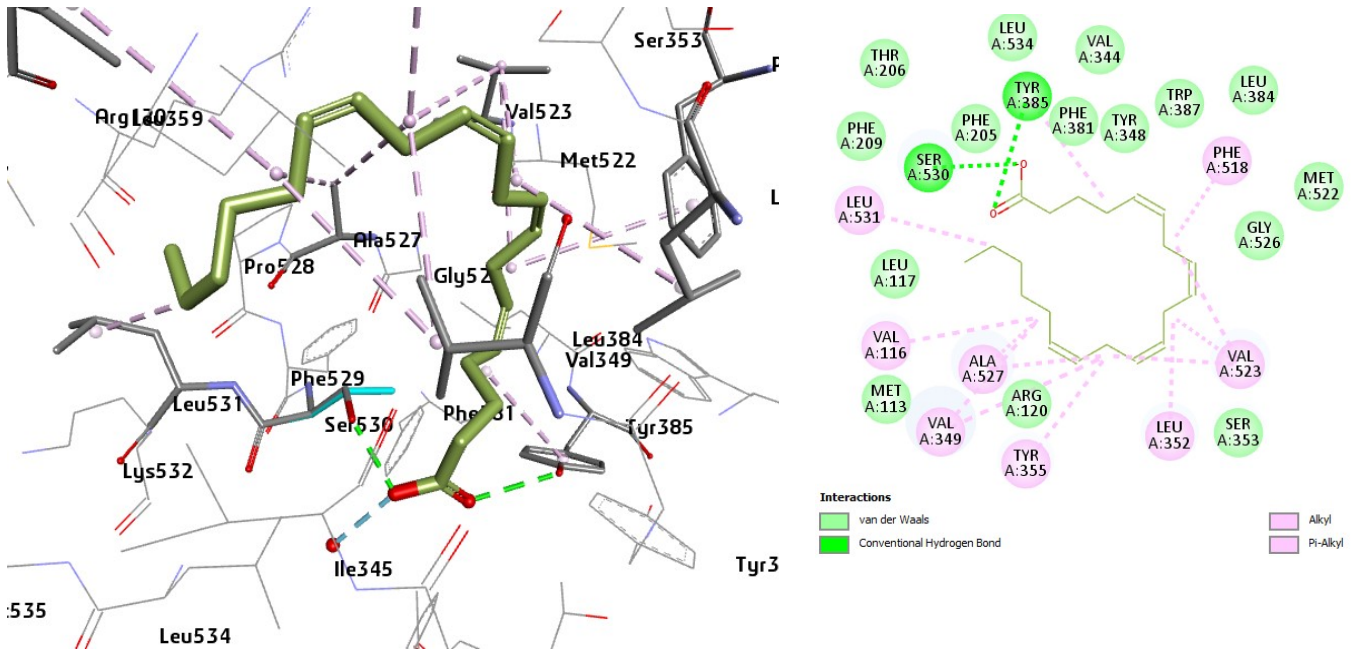

B

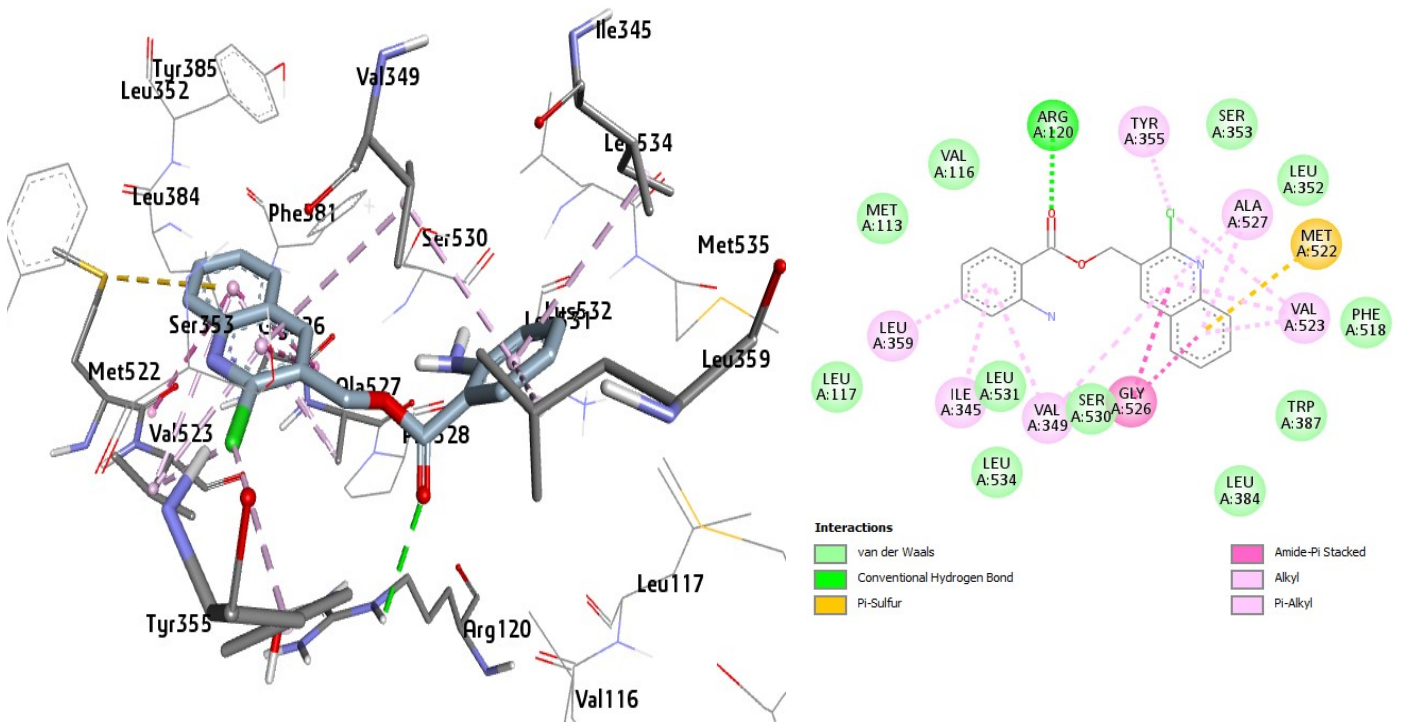

C

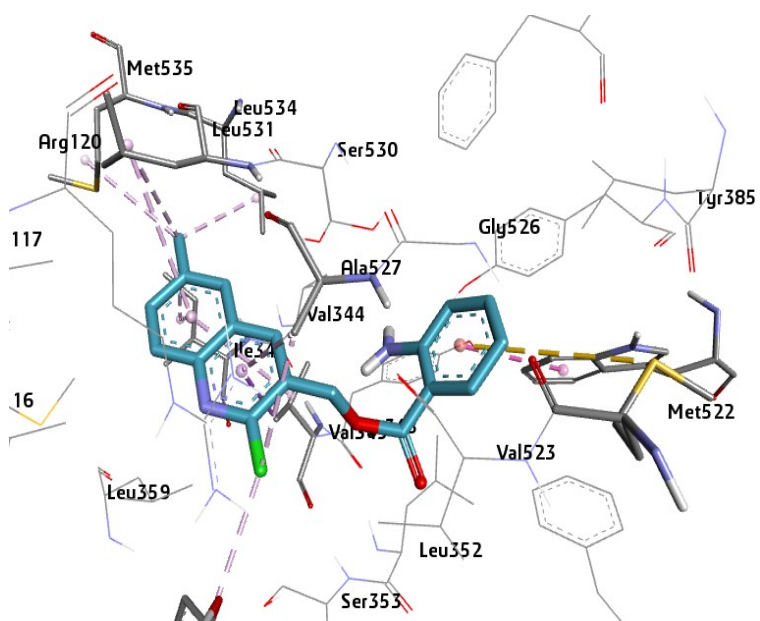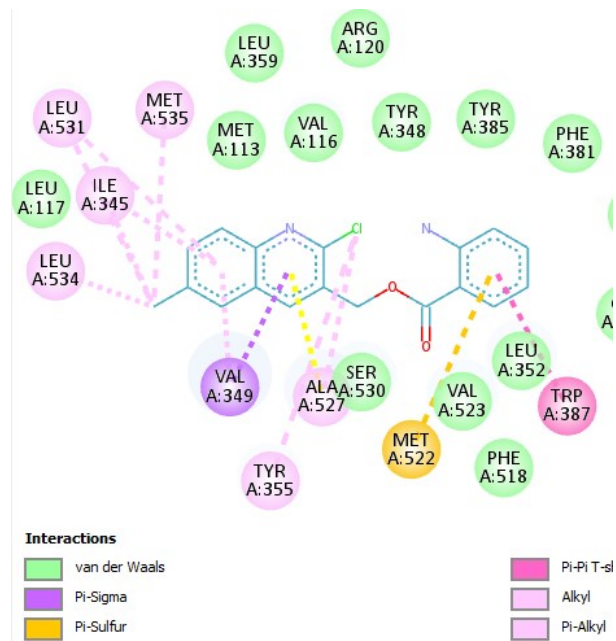

D

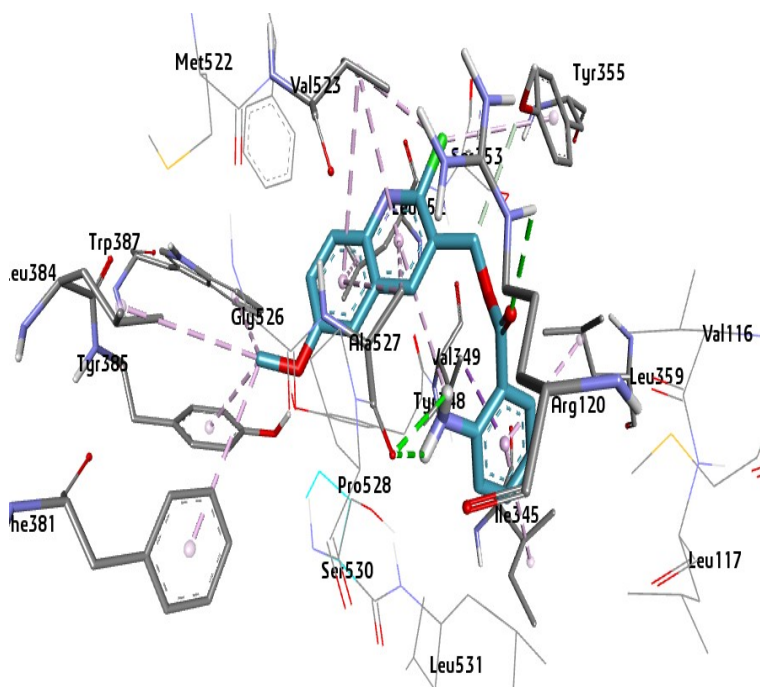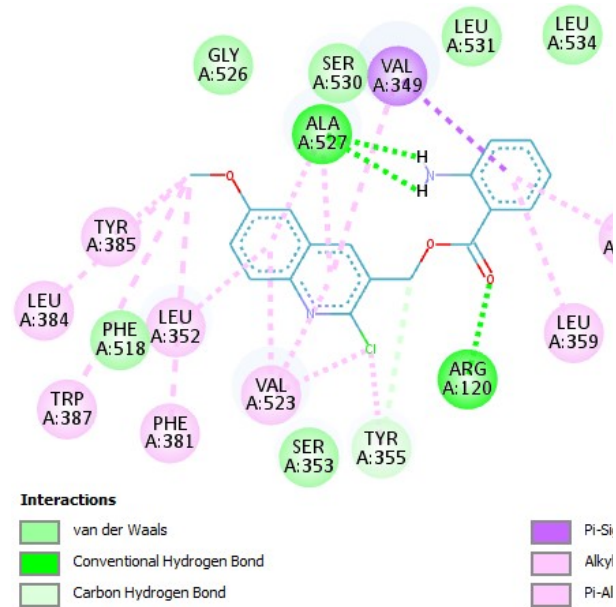

**Figure S4.** 3D and 2D images of ligands a) ACD (A), 5a (B), 5b (C) and 5c (D) docked with Cyclooxygenase-II (COX-II)

## 4 Experimental Data

### 4.1 Synthesis of Compounds

#### 4.1.1 Synthesis of acetamides (L/T/A)<sup>1</sup>

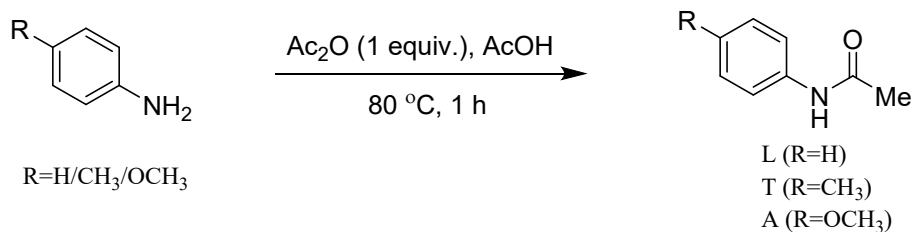

Substrate (1.0 g *p*-anisidine/*p*-toluidine/aniline) was taken in a round bottom flask, to which 1 equivalent of acetic anhydride and 2 equivalents of glacial acetic acid were added. The reaction mixture was then stirred and heated at 80 °C with constant stirring. Reaction progress was monitored by thin-layer chromatography (TLC). After 1 h, upon completion, the reaction mixture was poured into ice cold water (200ml) and the product (L/T/A), in the form of precipitates, was filtered, washed with water and air-dried.

**L: *N*-Phenylacetamide**, yield (1.26 g, 87%); **R<sub>f</sub>** (EtOAc:hexane 2:3) 0.39; **m.p.** 113–115 °C, Lit.<sup>2</sup> **m.p.** 112–114 °C; IR (neat, cm<sup>-1</sup>) 3070, 2913, 1663, 1654, 1617, 1591, 1458.

**T: *N*-(*p*-Tolyl)acetamide**, yield (1.22 g, 88%); **R<sub>f</sub>** (EtOAc:hexane 2:3) 0.32; **m.p.** 146–148 °C, Lit.<sup>1</sup> **m.p.** 147–148 °C; IR (neat, cm<sup>-1</sup>) 3123, 3068, 2968, 1661, 1654, 1600, 1456, 1497, 1320.

**A: *N*-(4-Methoxyphenyl) acetamide**, yield (1.14 g, 85%); **R<sub>f</sub>** (EtOAc:hexane 2:3) 0.21; **m.p.** 128–130 °C; IR (neat, cm<sup>-1</sup>) 3064, 2960, 2836, 1647, 1600, 1464, 1456, 1367, 1242, 1028.

#### 4.1.2 Synthesis of 1(a-c)<sup>3</sup>

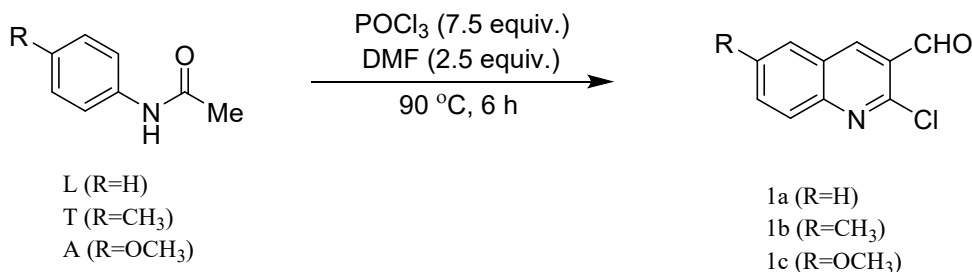

To the round bottom flask, *N,N*-dimethylformamide (2.5 equiv.) was added and stirred over an ice bath. Keeping the temperature at 0 °C, POCl<sub>3</sub> (7.5 equiv.) was added dropwise in 0.5 h, and after complete addition the *N*-acetamide (A/T/L) was added and the reaction mixture was transferred to

the hotplate and refluxed at 90 °C for 6 h over oil bath. Continuous monitoring was done using TLC and after consumption of substrate reaction mixture was allowed to cool a room temperature and then added to crushed ice and stirred again for 30 min. The resulting yellow precipitates were filtered, washed with cold water and air-dried. The crude product was purified by silica gel column chromatography using ethyl acetate and *n*-hexane (1:9) to afford the aldehyde 1(a-c).

### **2-Chloroquinoline-3-carbaldehyde (1a)**

**Yield** (0.94 g, 66%); **R<sub>f</sub>** (EtOAc:hexane, 1:4) 0.50; **m.p.** 148–150 °C, Lit.<sup>3</sup> **m.p.** 148–149 °C; **IR** (neat, cm<sup>-1</sup>) 3060, 1682, 1613, 1576, 1489, 1454, 1390, 748; **<sup>1</sup>H NMR** (600 MHz, CDCl<sub>3</sub>)  $\delta$  10.56 (s, 1H), 8.76 (s, 1H), 8.07 (d, *J* = 8.4 Hz, 1H), 7.98 (ddd, *J* = 8.2, 1.5, 0.5 Hz, 1H), 7.89 (ddd, *J* = 8.5, 6.8, 1.5 Hz, 1H), 7.65 (ddd, *J* = 8.2, 6.8, 1.2 Hz, 1H); **<sup>13</sup>C NMR** (150 MHz, CDCl<sub>3</sub>)  $\delta$  189.3, 150.2, 149.7, 140.4, 133.7, 129.8, 128.7, 128.2, 126.6, 126.5.

### **2-Chloro-6-methylquinoline-3-carbaldehyde (1b)**

**Yield** (0.90 g, 65%); **R<sub>f</sub>** (EtOAc:hexane, 1:4) 0.64; **m.p.** 123–125 °C, Lit.<sup>3</sup> **m.p.** 124–125 °C; **IR** (neat, cm<sup>-1</sup>) 3072, 2952, 2923, 2875, 1686, 1584, 1490, 1457, 735; **<sup>1</sup>H NMR** (600 MHz, CDCl<sub>3</sub>)  $\delta$  10.54 (s, 1H), 8.66 (s, 1H), 7.96 (d, *J* = 8.6 Hz, 1H), 7.72 (d, *J* = 2.0 Hz, 1H), 7.70 (dd, *J* = 8.6, 2.0 Hz, 1H), 2.56 (s, 3H); **<sup>13</sup>C NMR** (150 MHz, CDCl<sub>3</sub>)  $\delta$  189.4, 149.4, 148.3, 139.7, 138.5, 136.1, 128.5, 128.3, 126.7, 126.4, 21.6.

### **2-Chloro-6-methoxyquinoline-3-carbaldehyde (1c)**

**Yield** (0.86 g, 64%); **R<sub>f</sub>** (EtOAc:hexane, 1:4) 0.52; **m.p.** 144–146 °C, Lit.<sup>3</sup> **m.p.** 145–147 °C; **IR** (neat, cm<sup>-1</sup>) 3053, 2956, 2870, 1616, 1680, 1571, 1492, 1465, 1395, 1227, 1050, 730.

## 5 Spectroscopic Data

### 5.1 $^1\text{H}$ NMR ( $\text{CDCl}_3$ , 600 MHz) of 2-Chloroquinoline-3-carbaldehyde (1a)

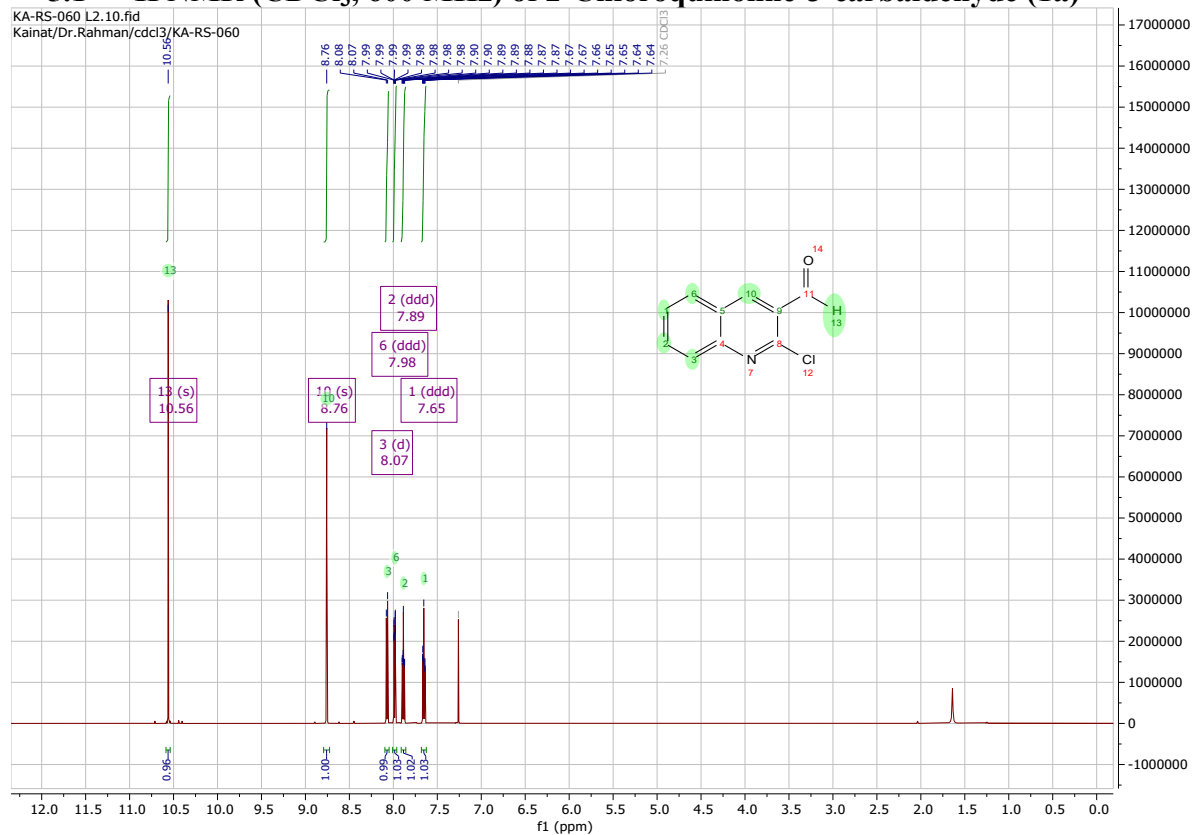



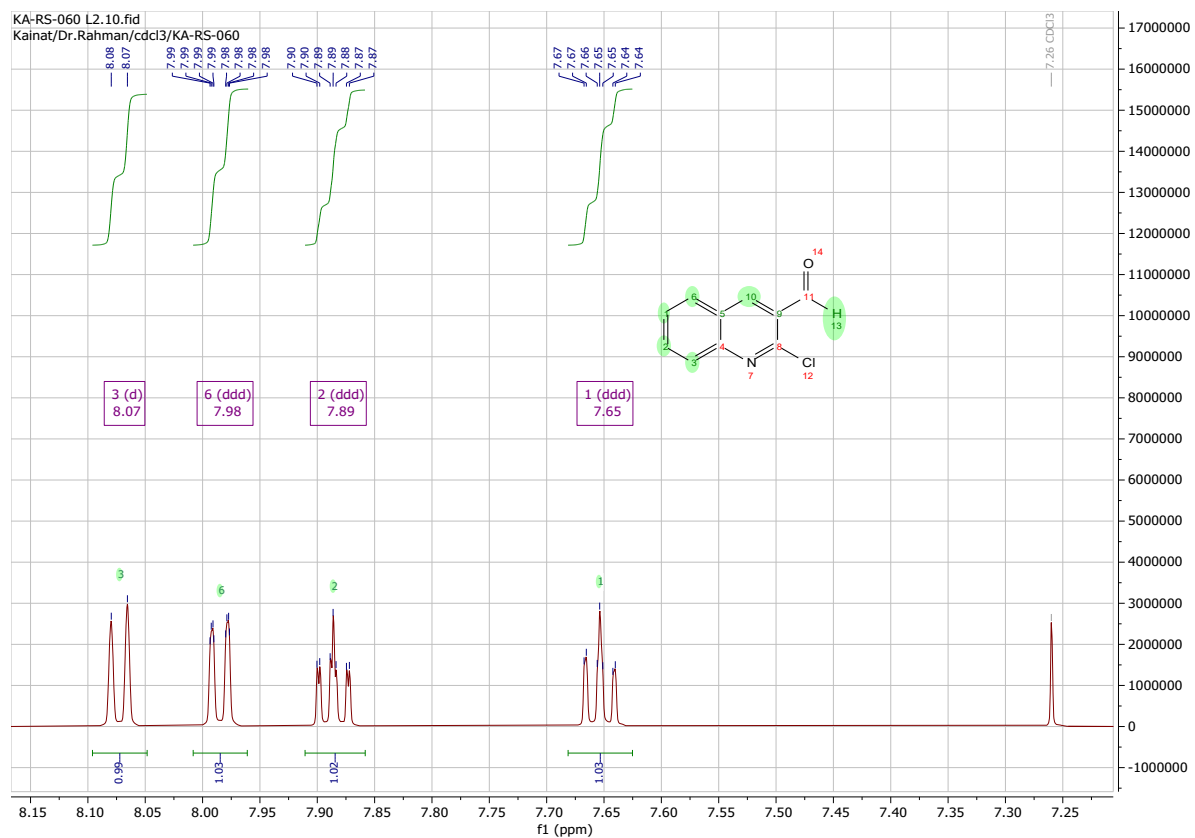

## 5.2 <sup>13</sup>C NMR (CDCl<sub>3</sub>, 150 MHz) of 2-Chloroquinoline-3-carbaldehyde (1a)

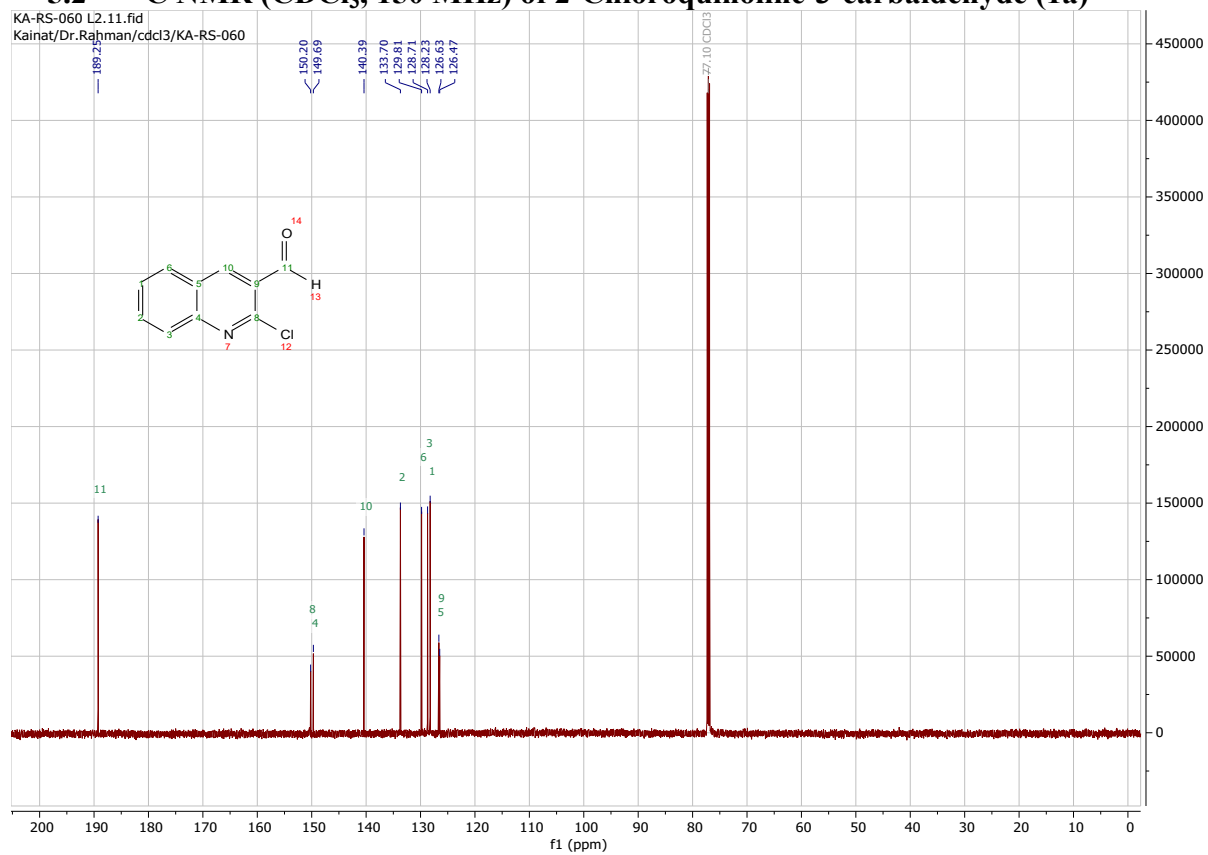

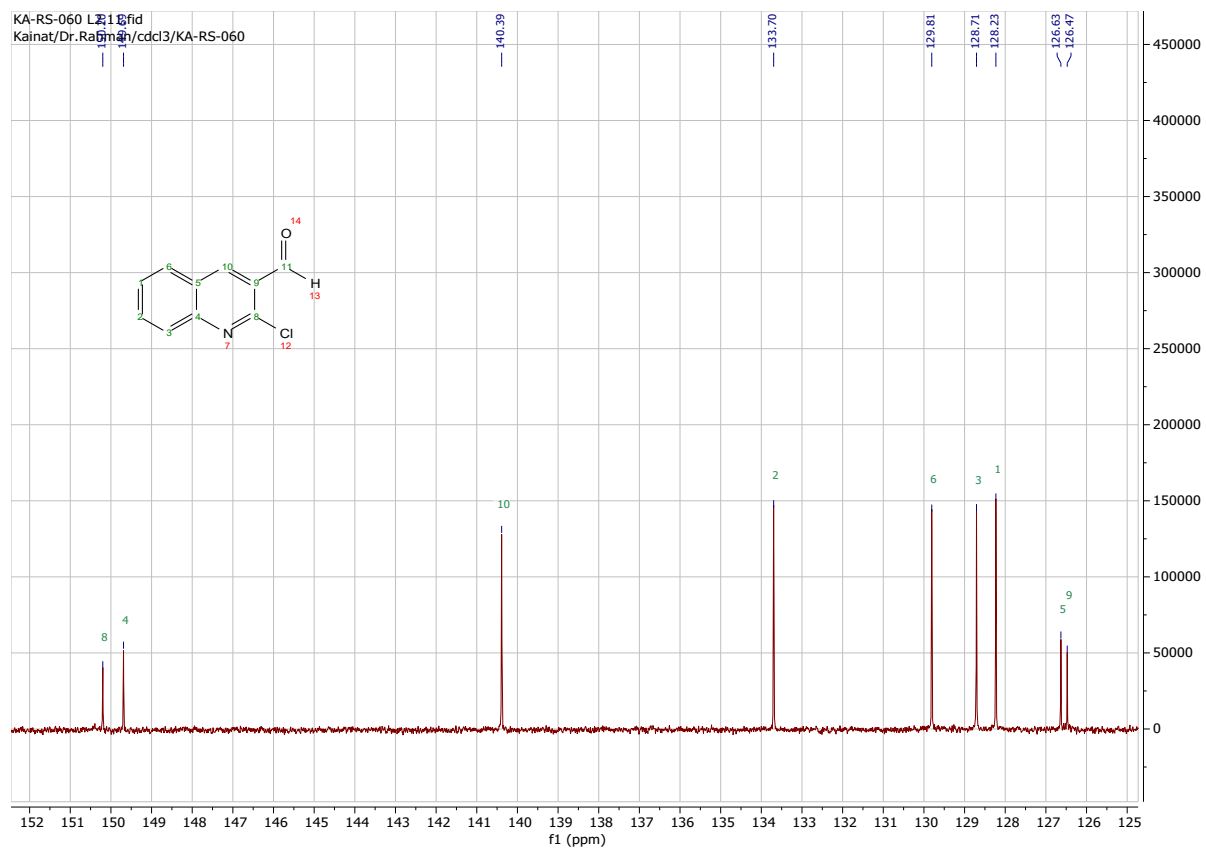

### 5.3 DEPT-135 NMR (CDCl<sub>3</sub>, 150 MHz) of 2-Chloroquinoline-3-carbaldehyde (1a)

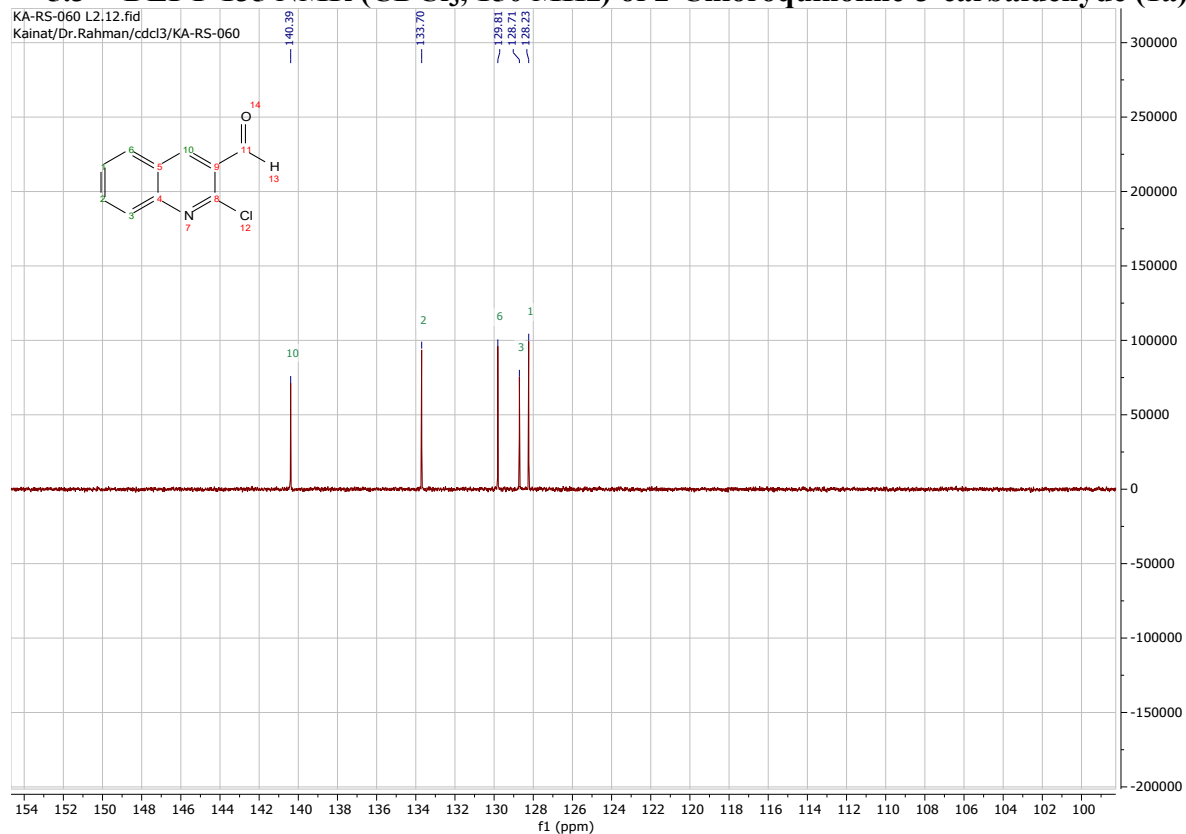

## 5.4 $^1\text{H}$ NMR ( $\text{CDCl}_3$ , 600 MHz) of 2-Chloro-6-methylquinoline-3-carbaldehyde 1b

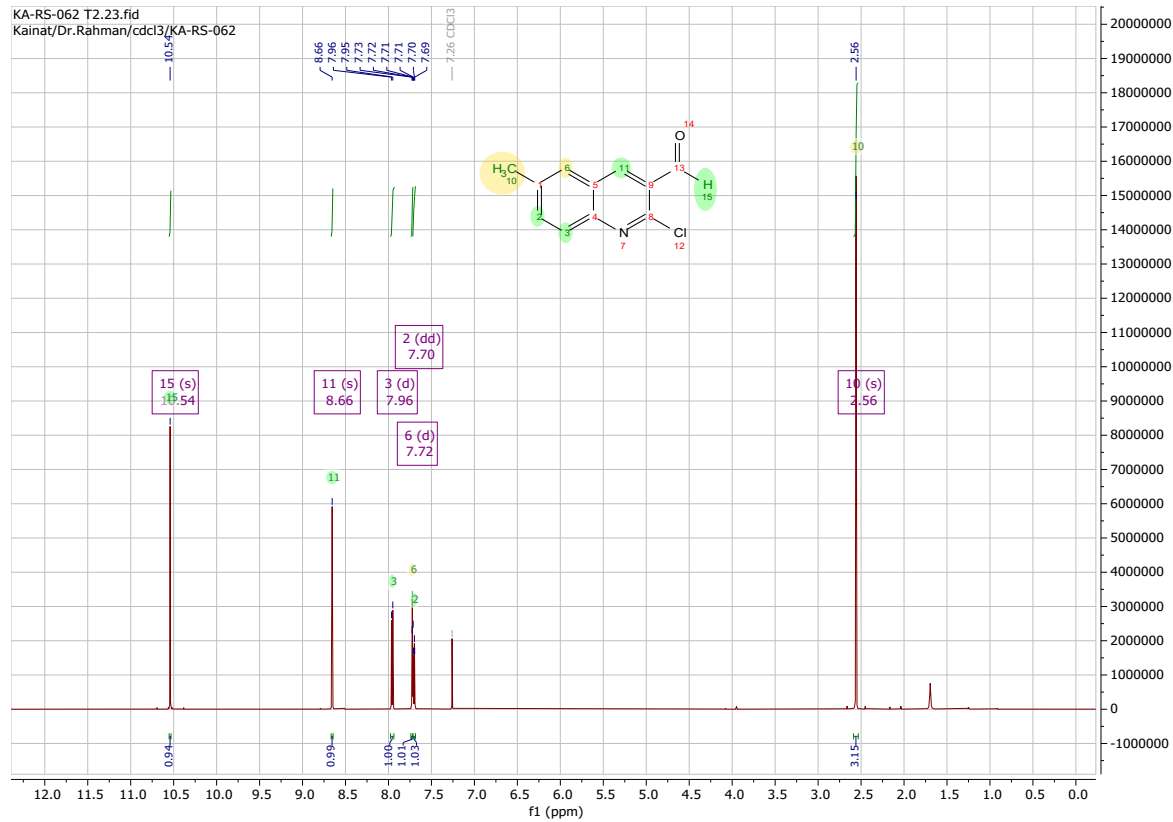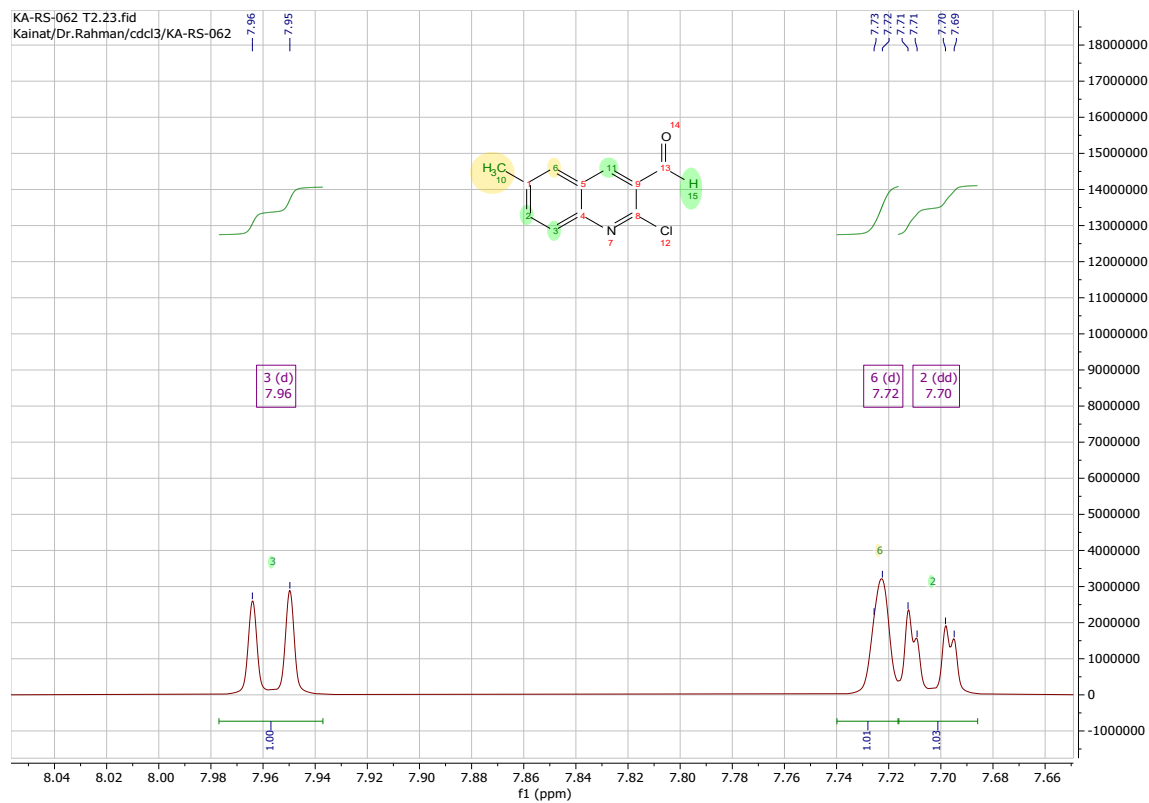

## 5.5 $^{13}\text{C}$ NMR (CDCl<sub>3</sub>, 150 MHz) of 2-Chloro-6-methylquinoline-3-carbaldehyde 1b

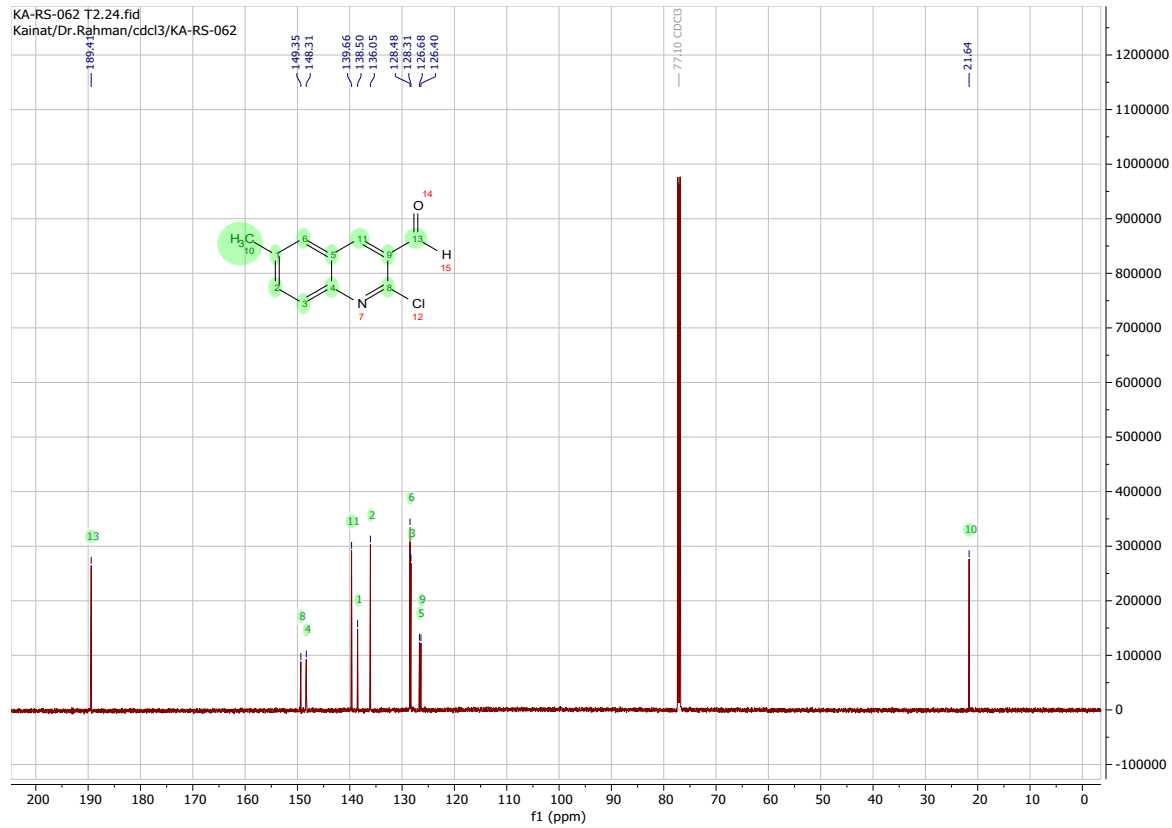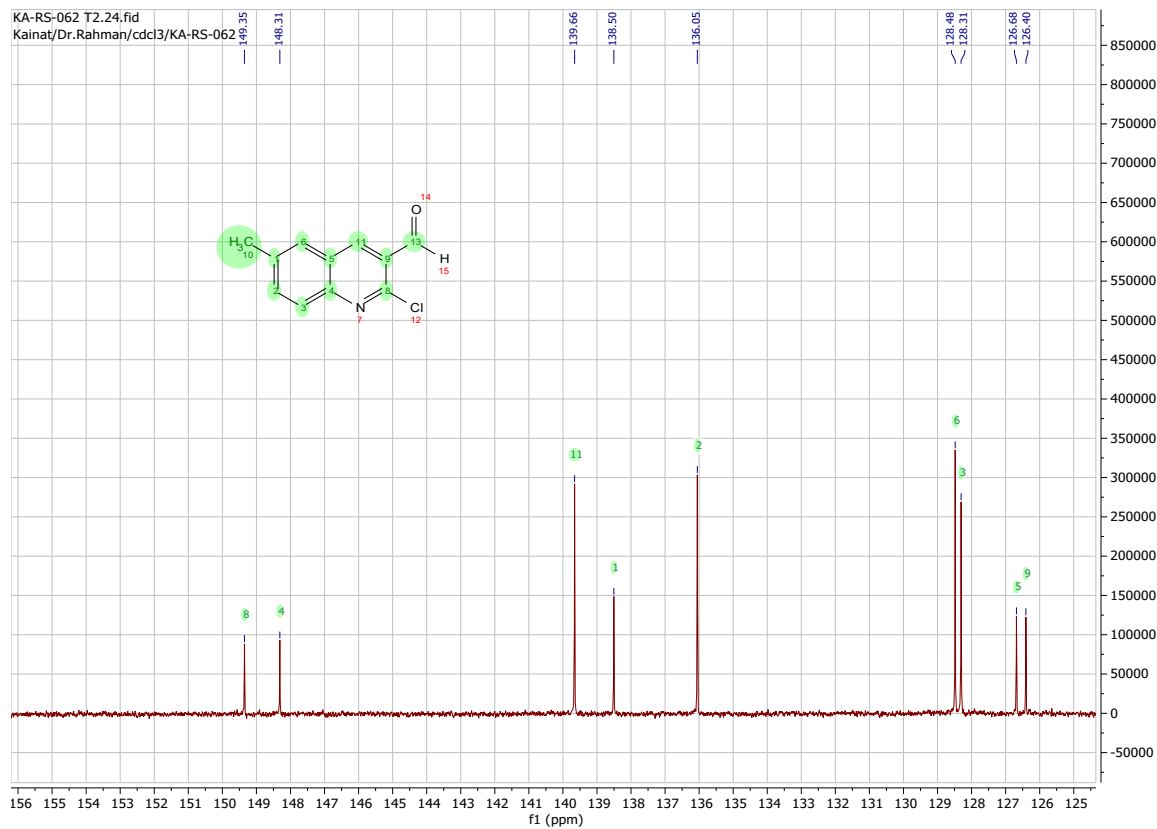

### 5.6 DEPT-135 NMR (CDCl<sub>3</sub>, 150 MHz) of 2-Chloro-6-methylquinoline-3-carbaldehyde 1b

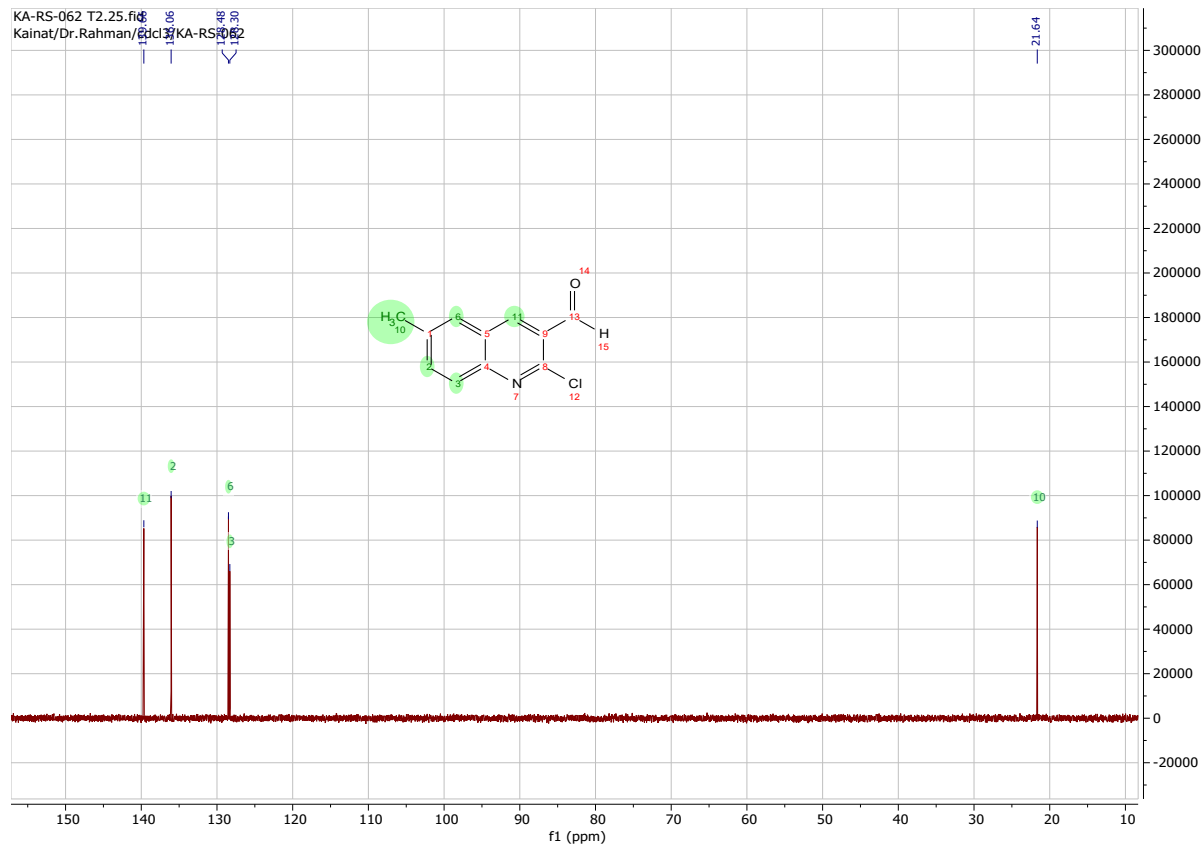

### 5.7 <sup>1</sup>H NMR (CDCl<sub>3</sub>, 600 MHz) of (2-Chloroquinolin-3-yl)methanol (2a)

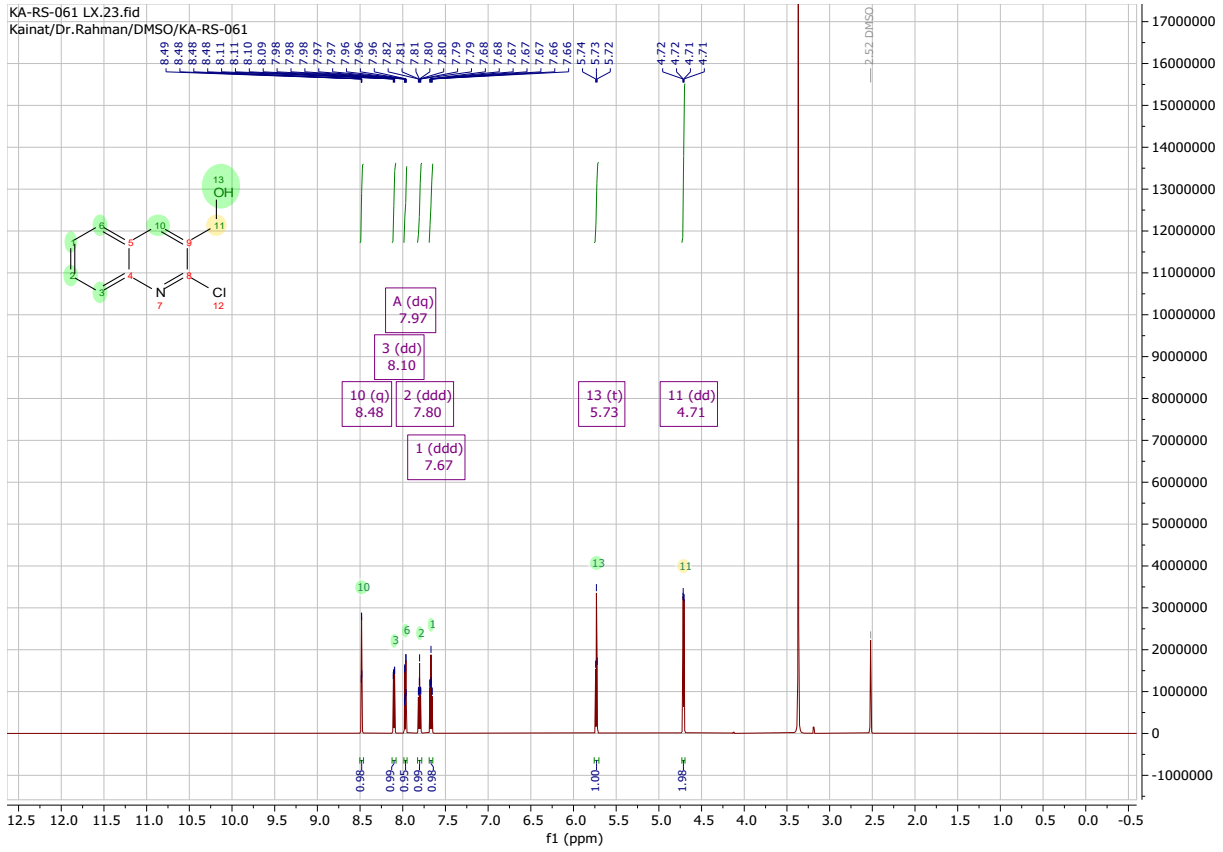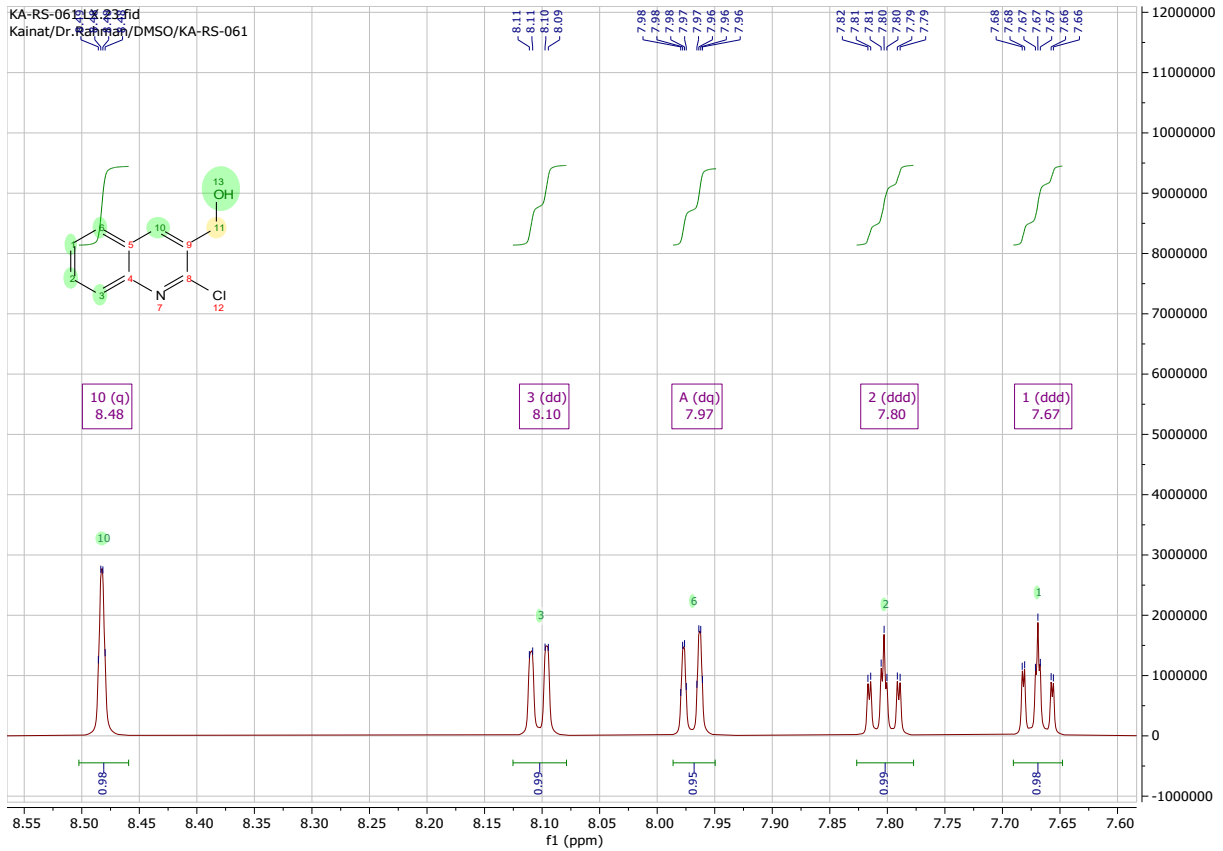

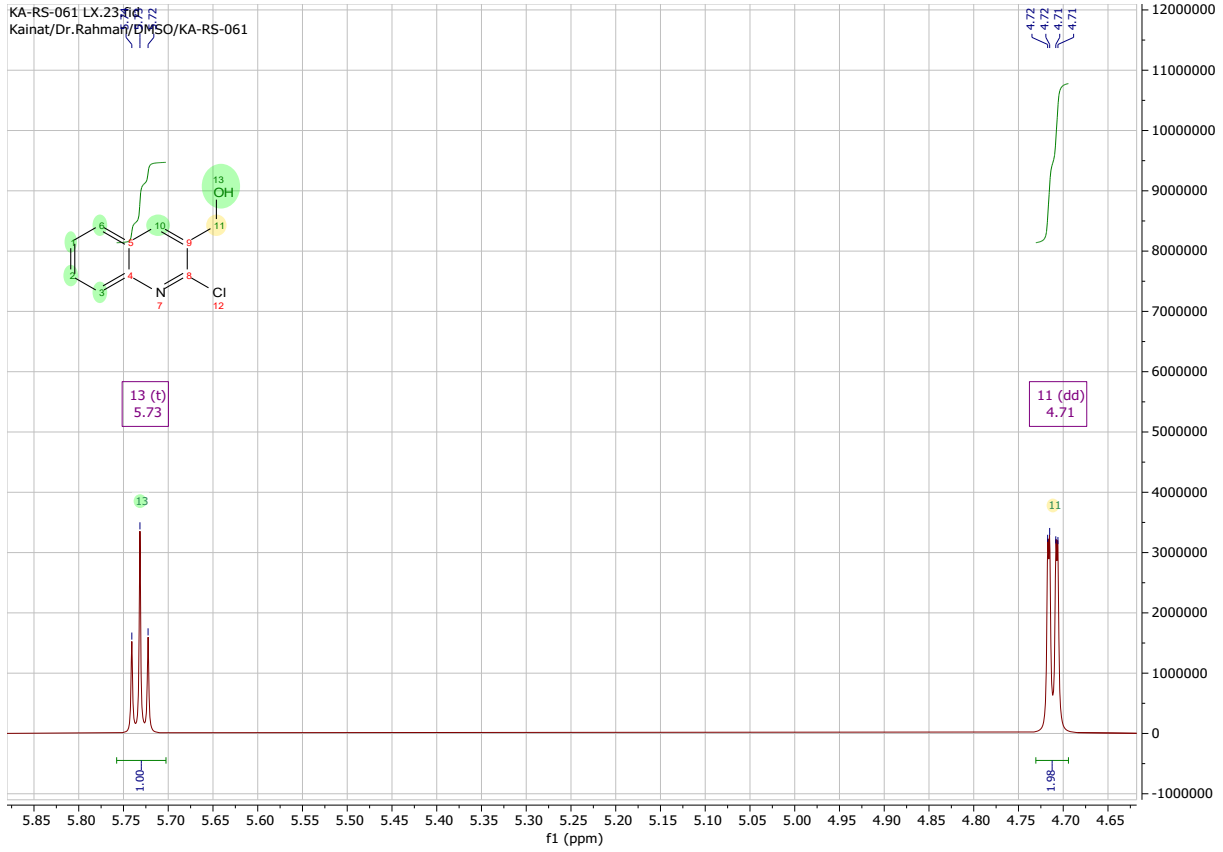

### 5.8 <sup>13</sup>C NMR (CDCl<sub>3</sub>, 150 MHz) of (2-Chloroquinolin-3-yl)methanol (2a)

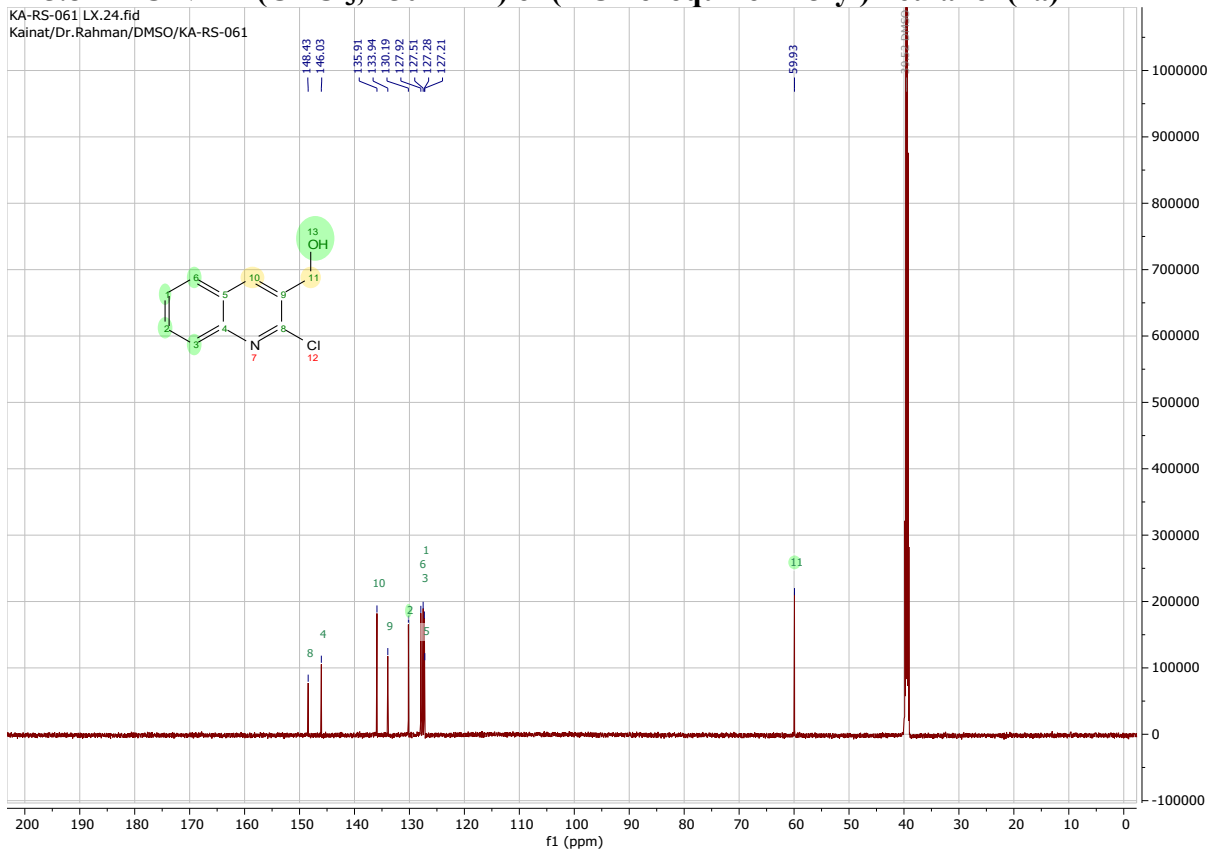

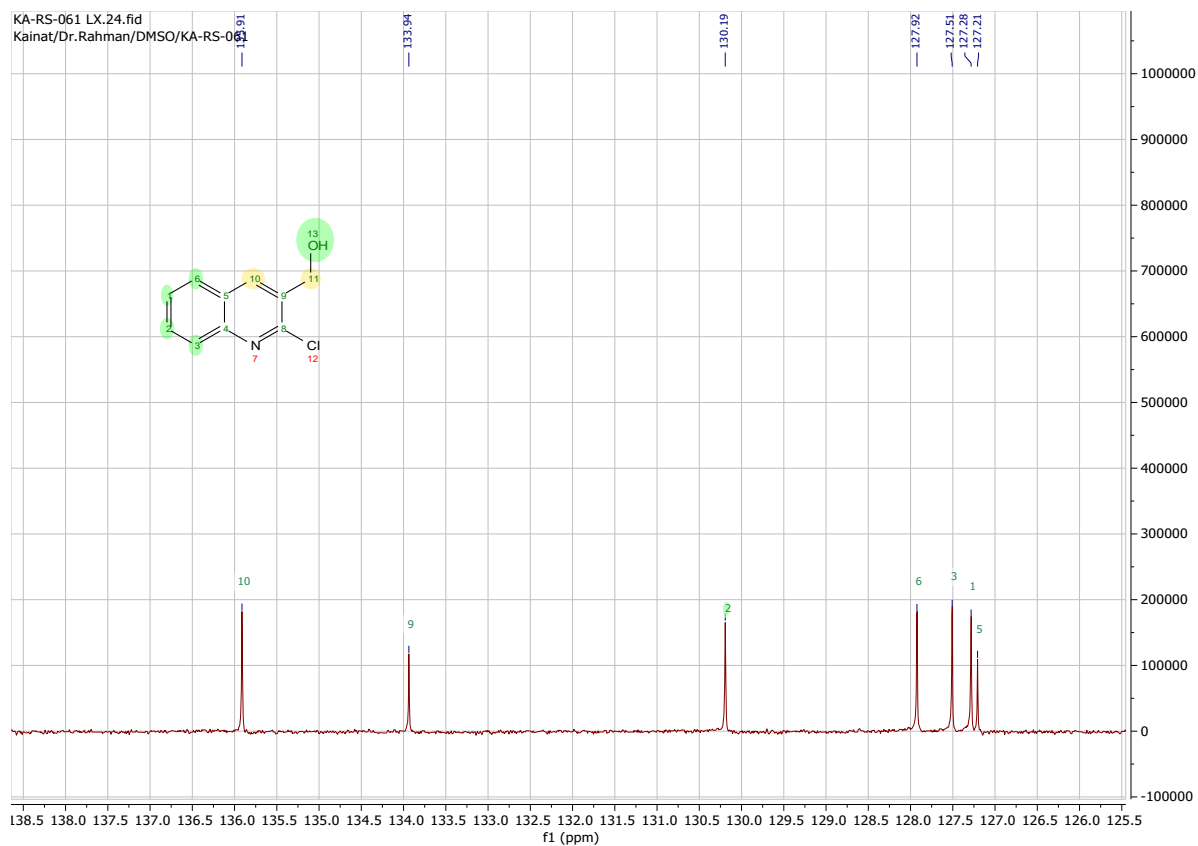

### 5.9 DEPT-135 NMR (CDCl<sub>3</sub>, 150 MHz) of (2-Chloroquinolin-3-yl)methanol (2a)

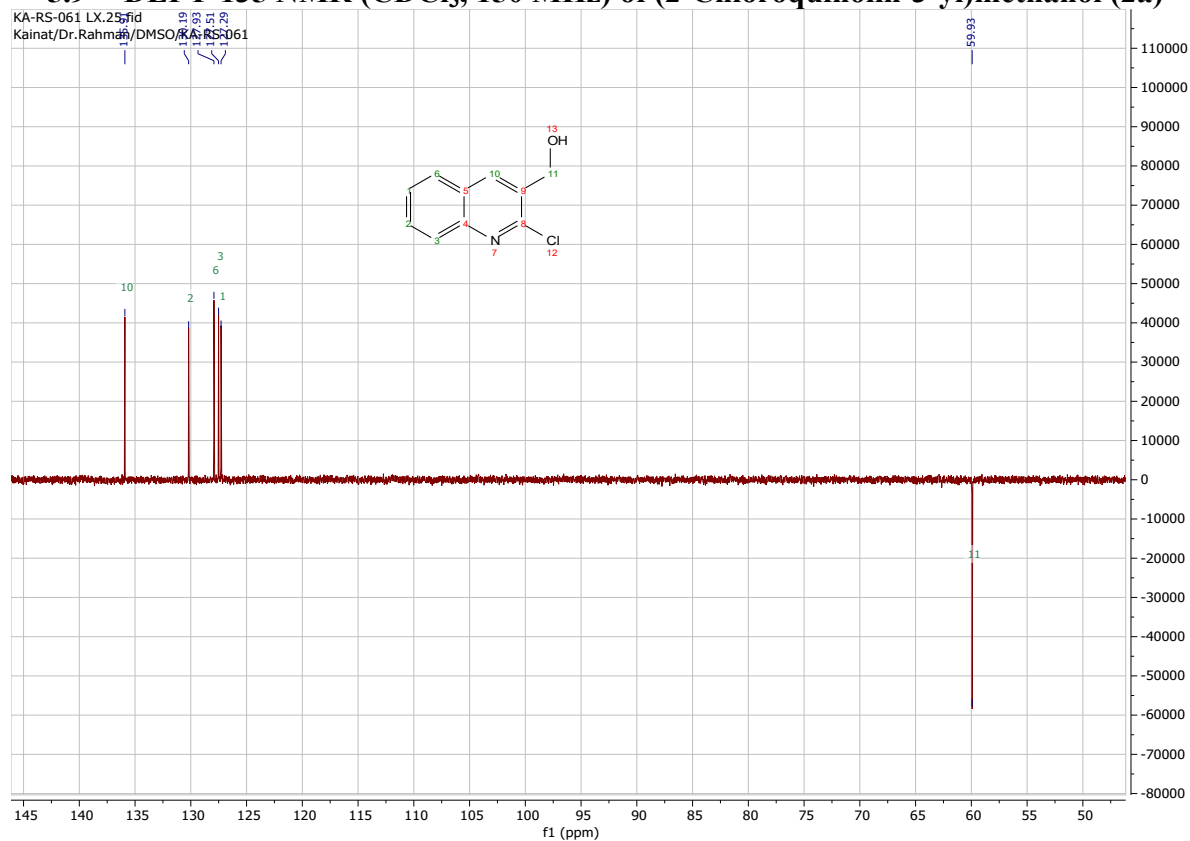



### 5.10 <sup>1</sup>H NMR (DMSO, 600 MHz) of (2-Chloro-6-methylquinolin-3-yl)methanol (2b)

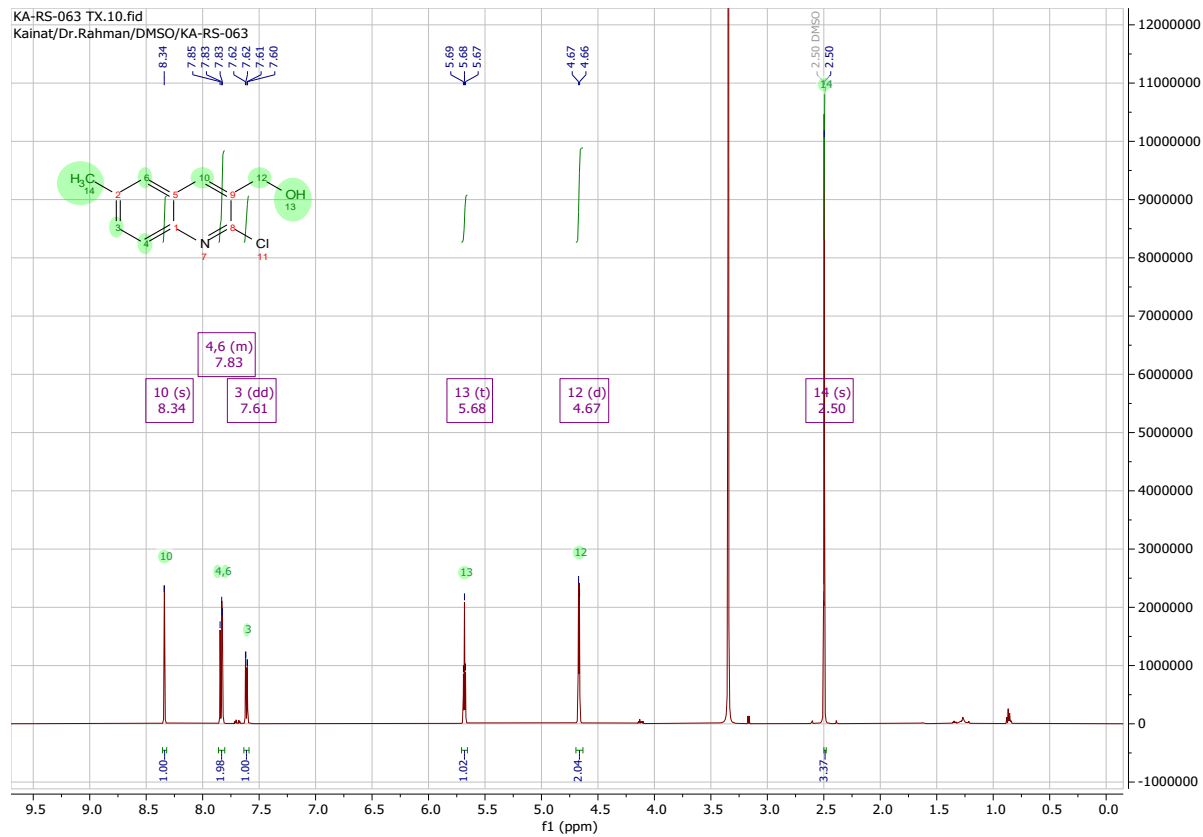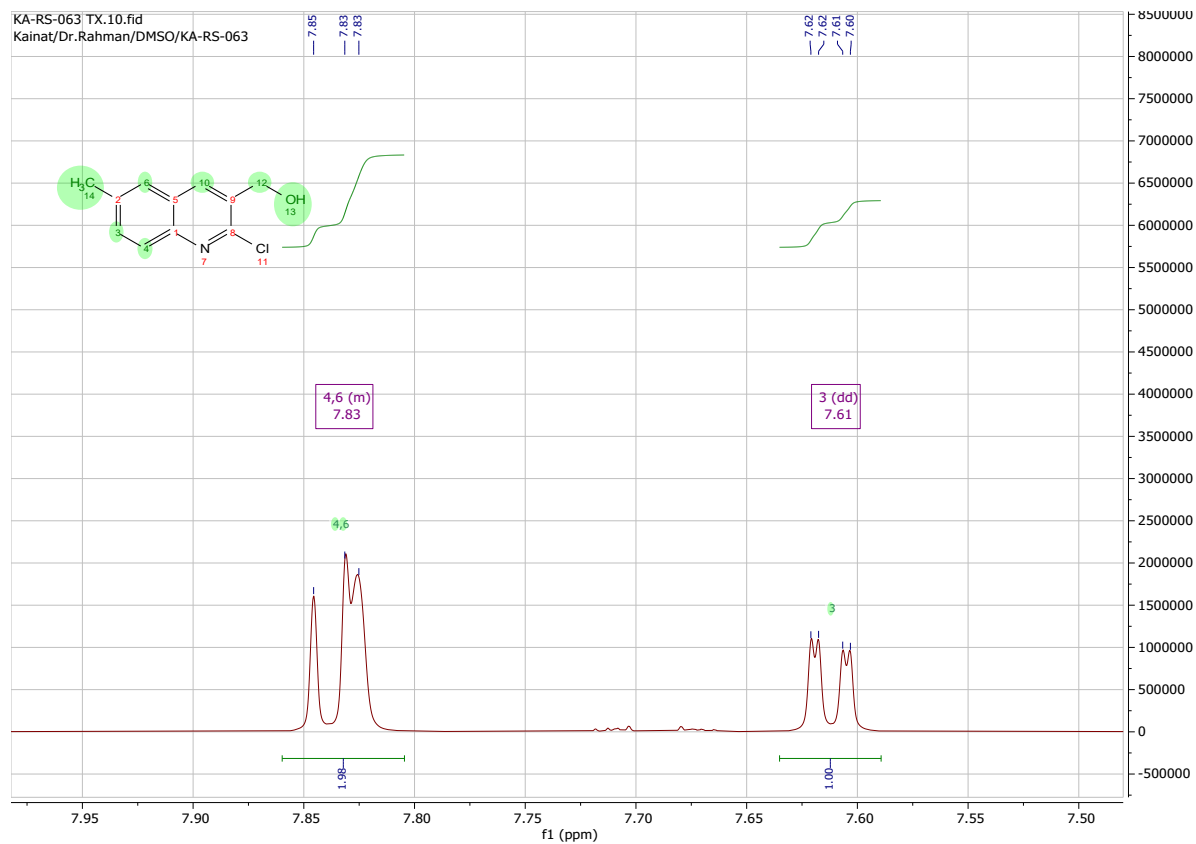

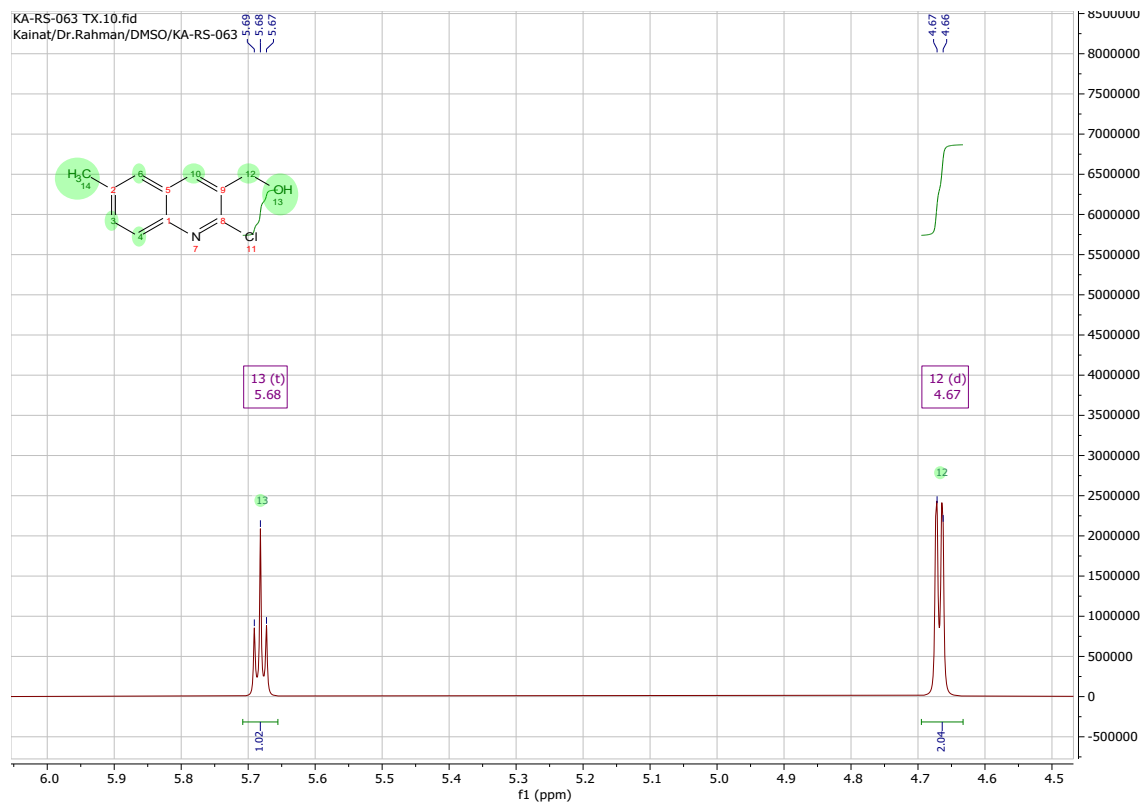

### 5.11 <sup>13</sup>C NMR (DMSO, 150 MHz) of (2-Chloro-6-methylquinolin-3-yl)methanol (2b)

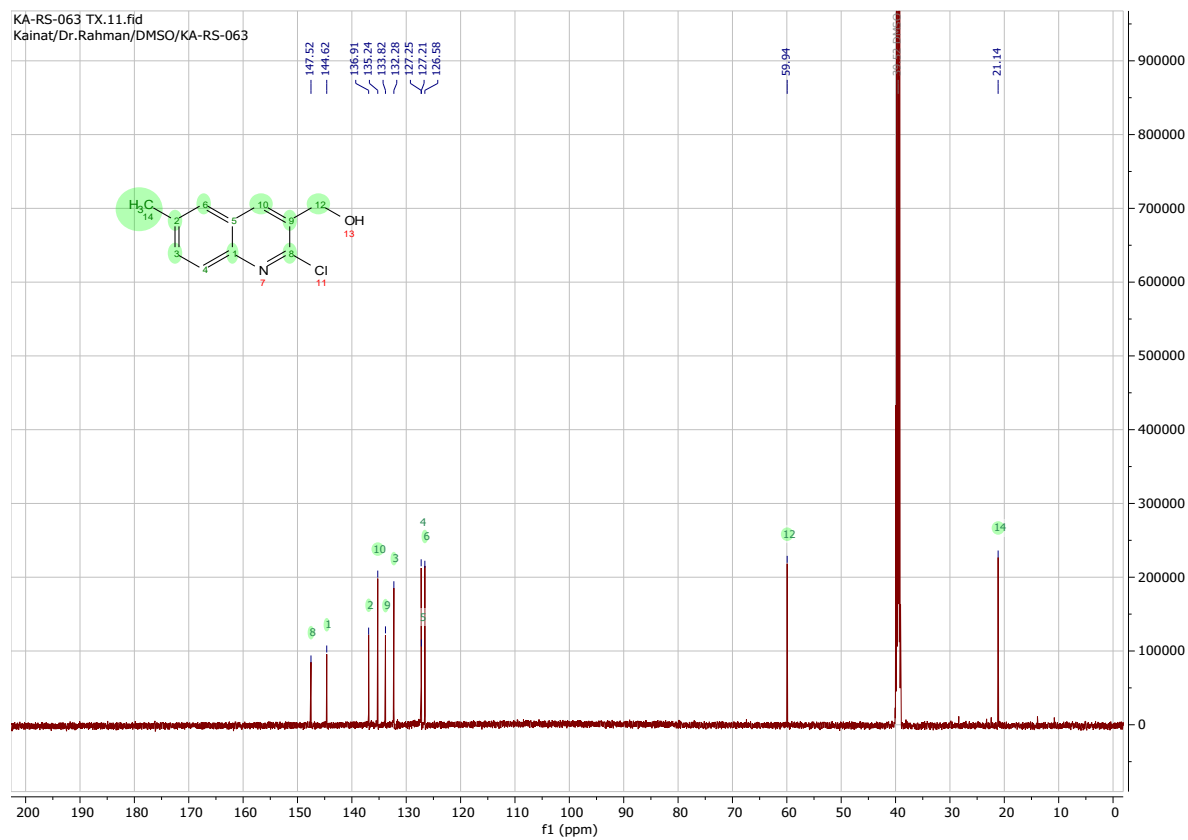

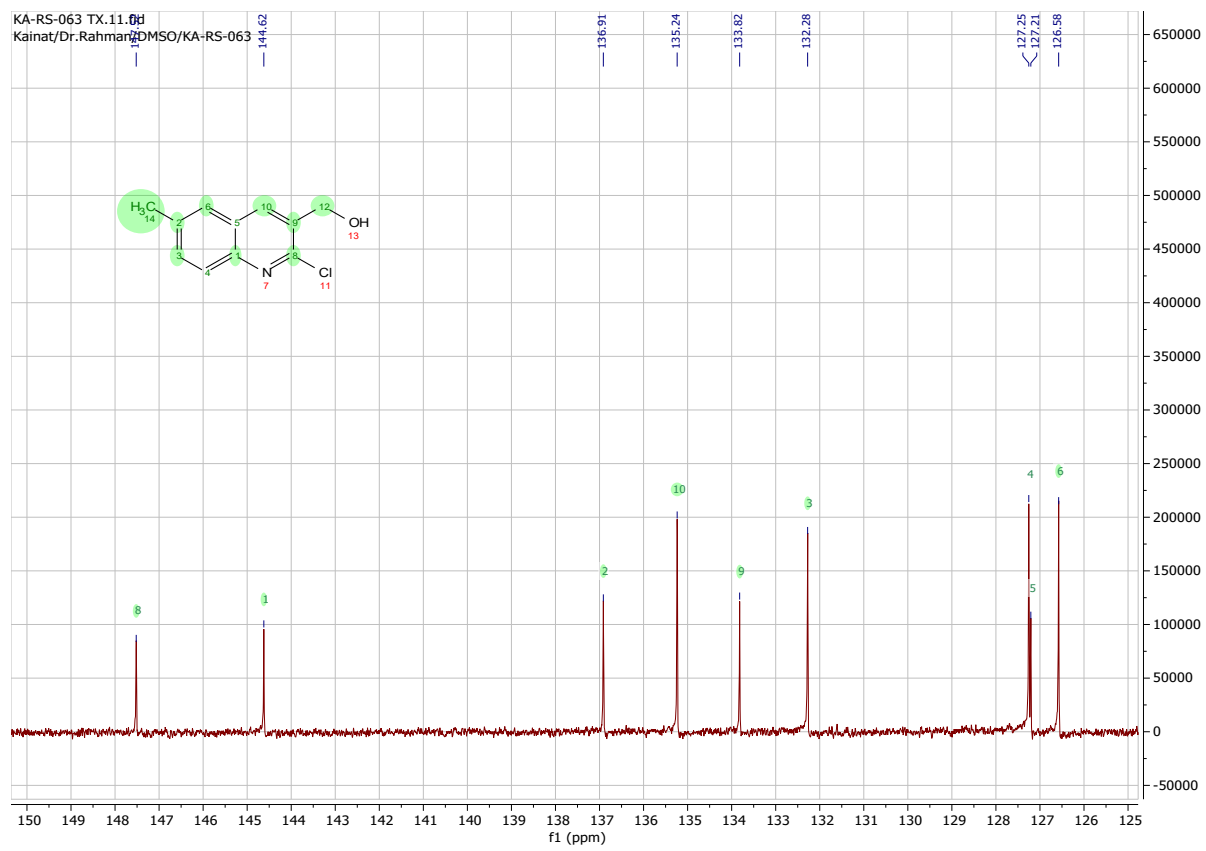

## 5.12 DEPT-135 NMR (DMSO, 150 MHz) of (2-Chloro-6-methylquinolin-3-yl)methanol

(2b)

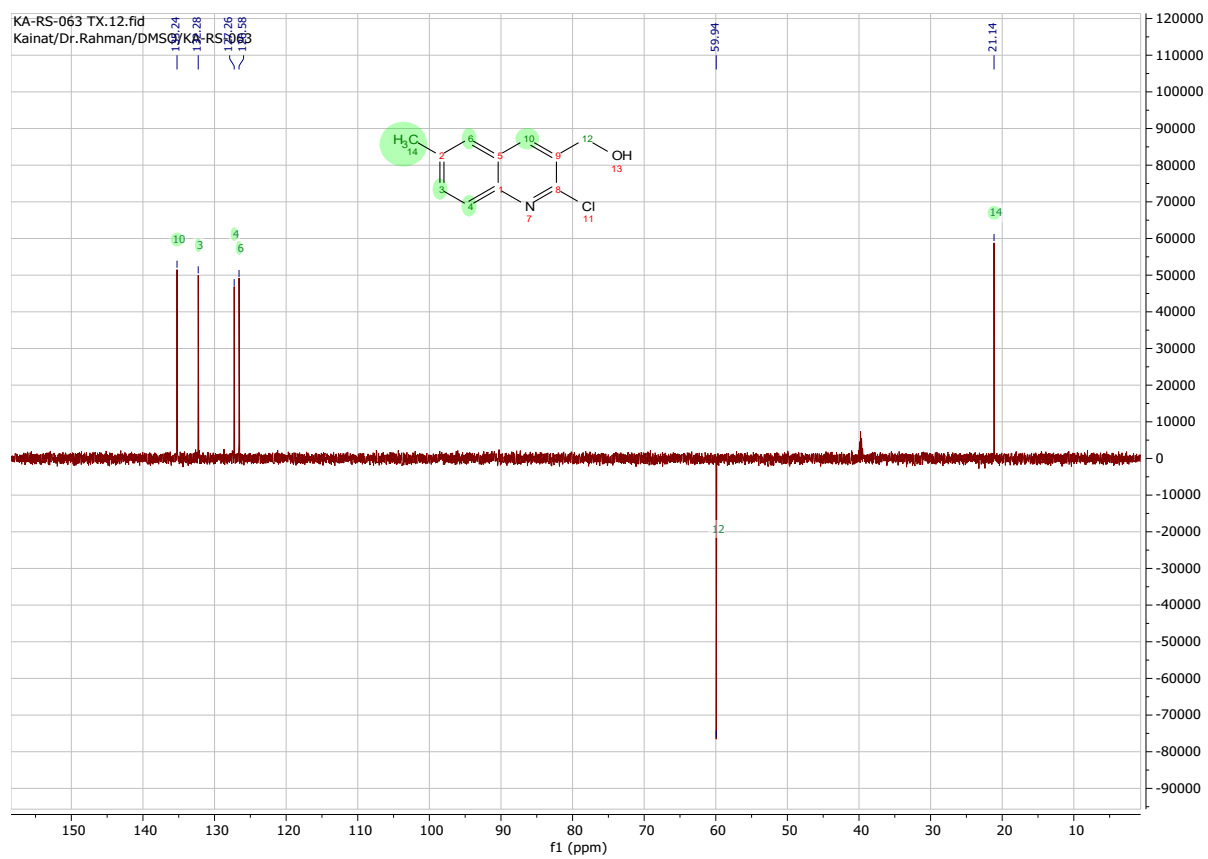

### 5.13 <sup>1</sup>H NMR (CDCl<sub>3</sub>, 400 MHz) of (2-Chloroquinolin-3-yl)methyl 2-aminobenzoate (5a)

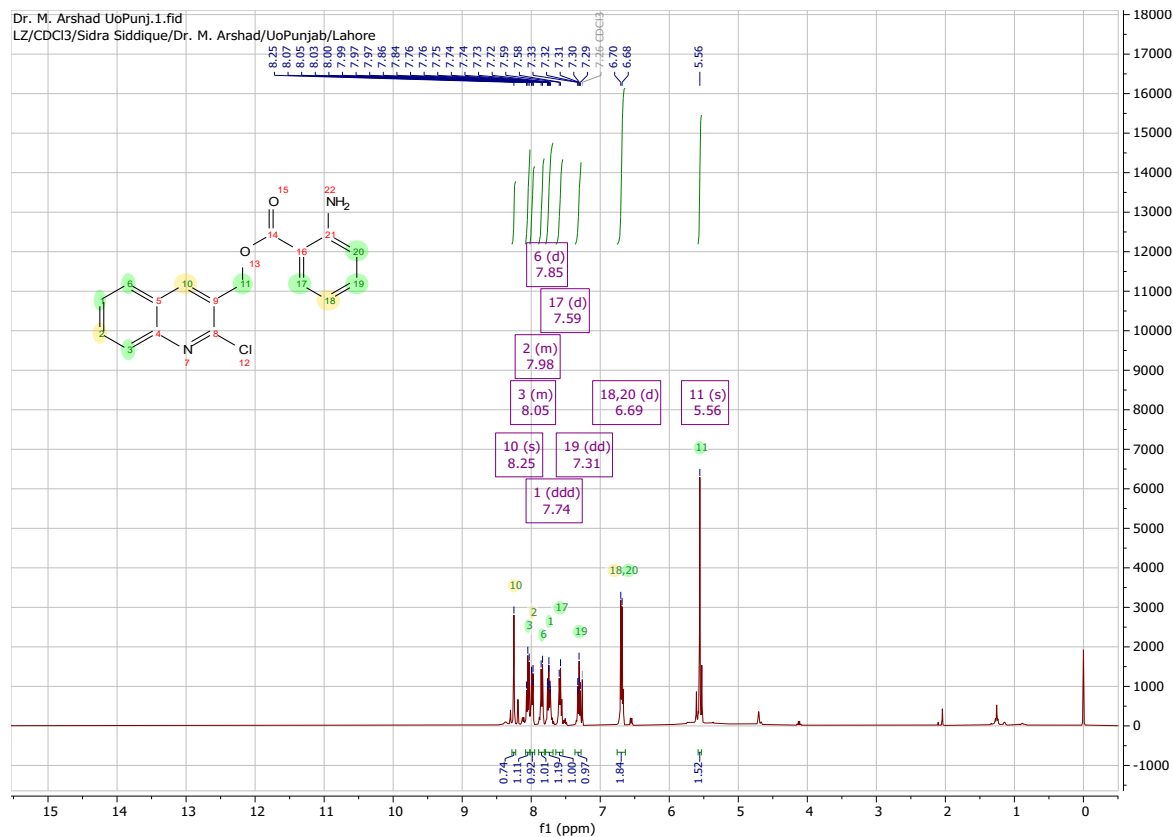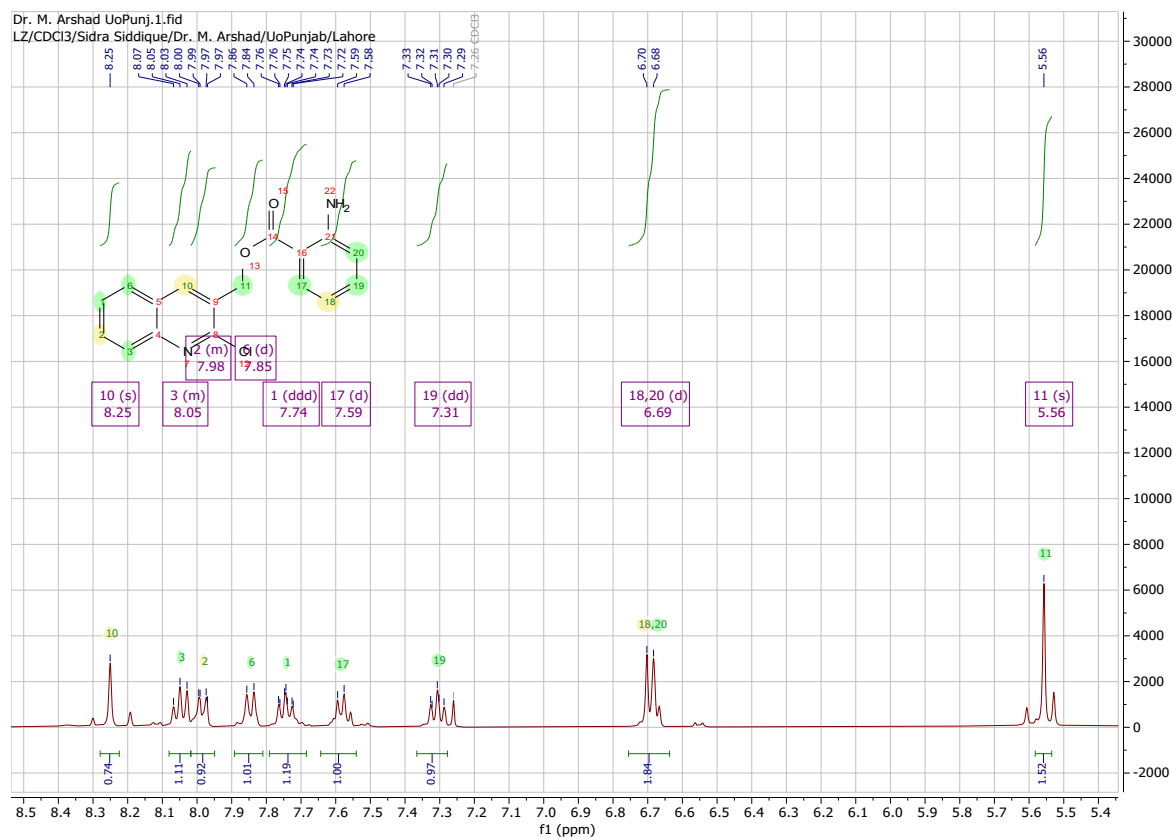

### 5.14 <sup>13</sup>C NMR (CDCl<sub>3</sub>, 400 MHz) of (2-chloroquinolin-3-yl)methyl-2-aminobenzoate (5a)

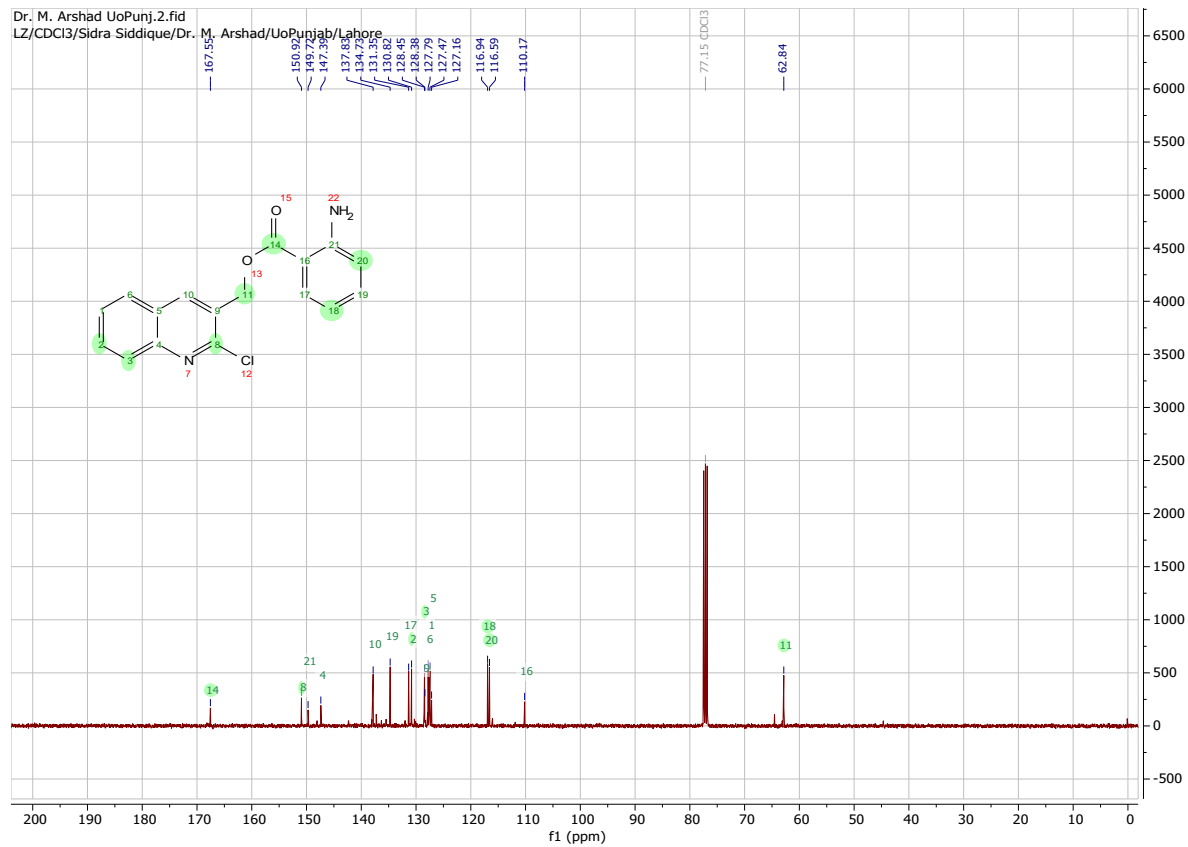

### 5.15 <sup>1</sup>H NMR (CDCl<sub>3</sub>, 400 MHz) of (2-Chloro-6-methylquinolin-3-yl)methyl 2-aminobenzoate (5b)

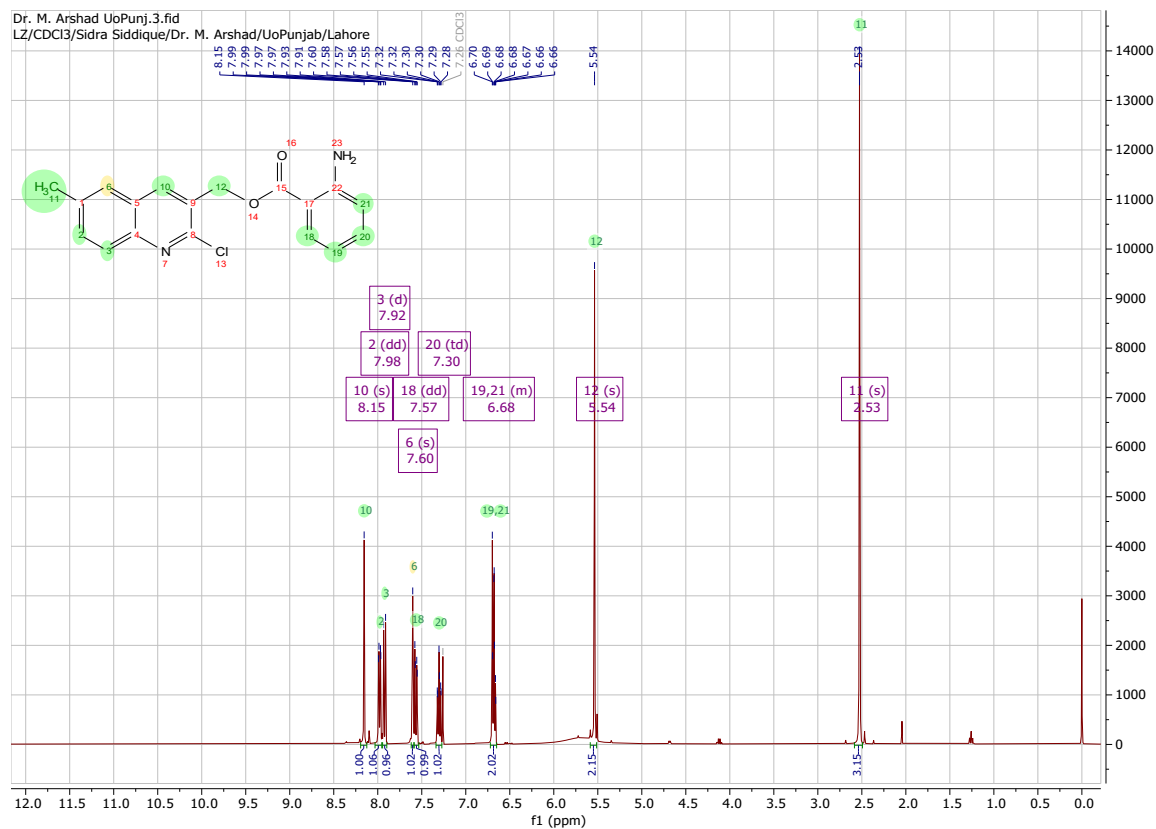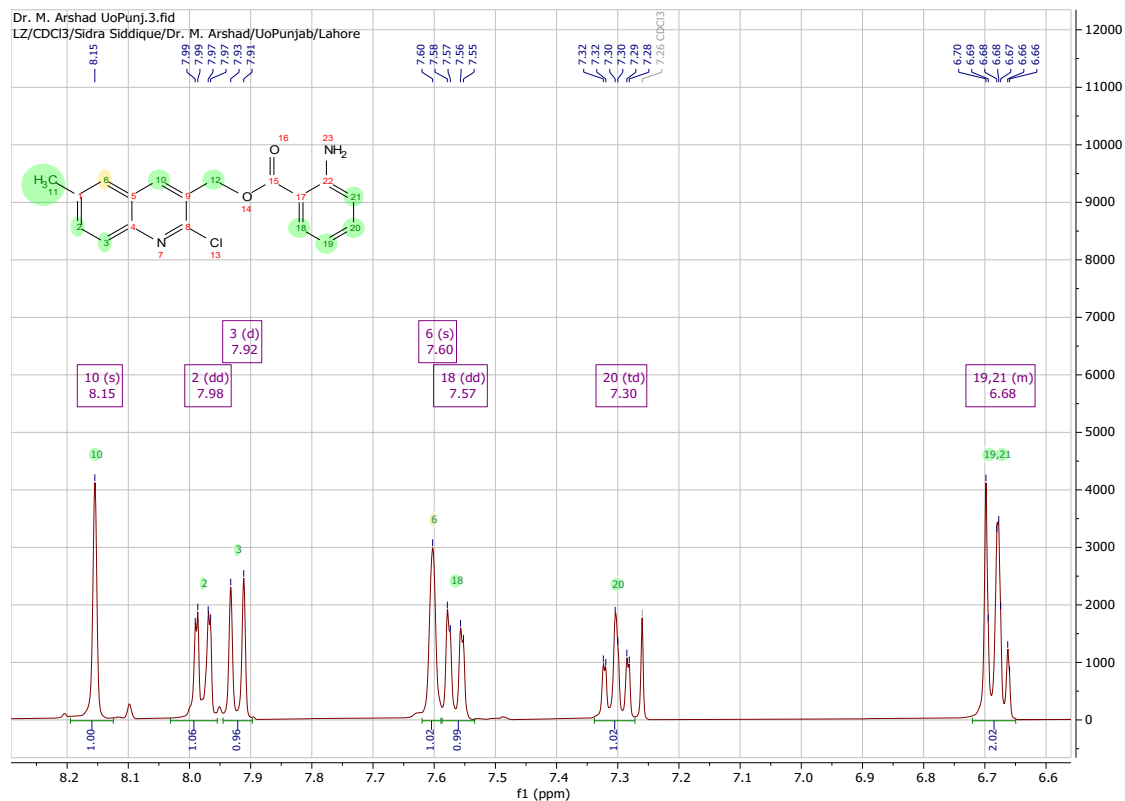

### 5.16 <sup>13</sup>C NMR (CDCl<sub>3</sub>, 100 MHz) of (2-Chloro-6-methylquinolin-3-yl)methyl 2-aminobenzoate (5b)

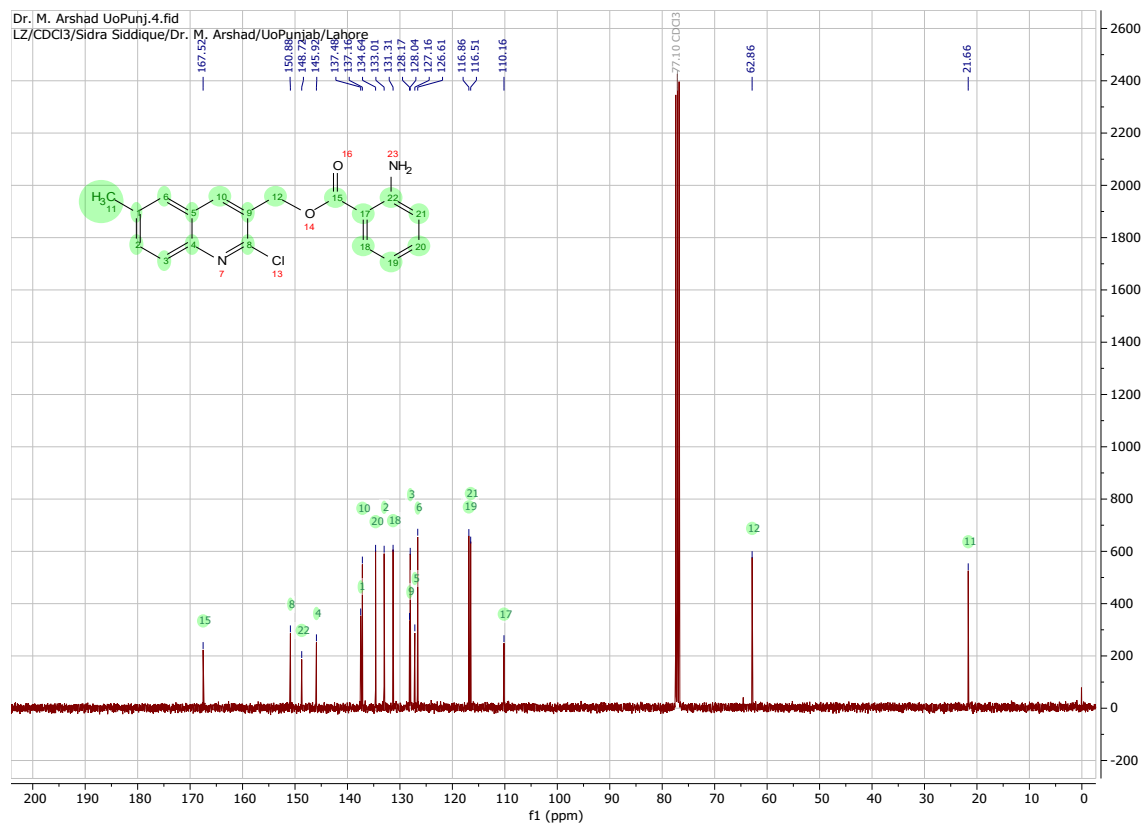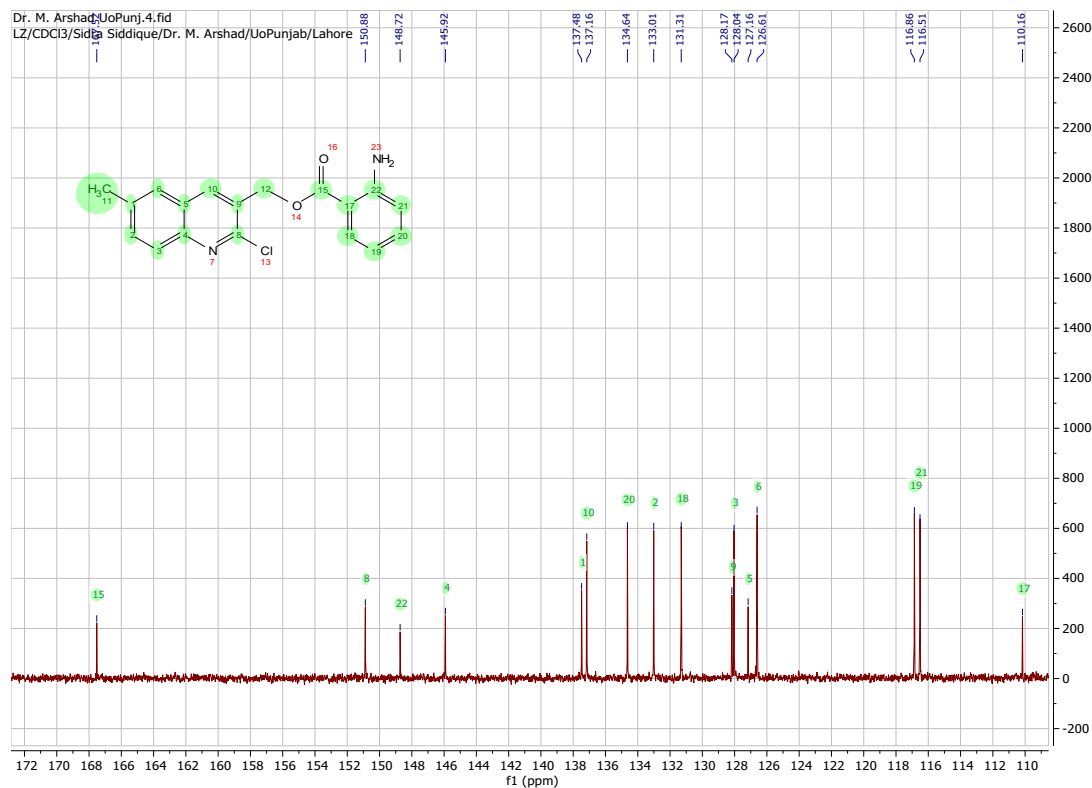



5.17  $^1\text{H}$  NMR (300 MHz, DMSO) of (2-Chloro-6-methoxyquinolin-3-yl)methyl-2-aminobenzoate (5c)

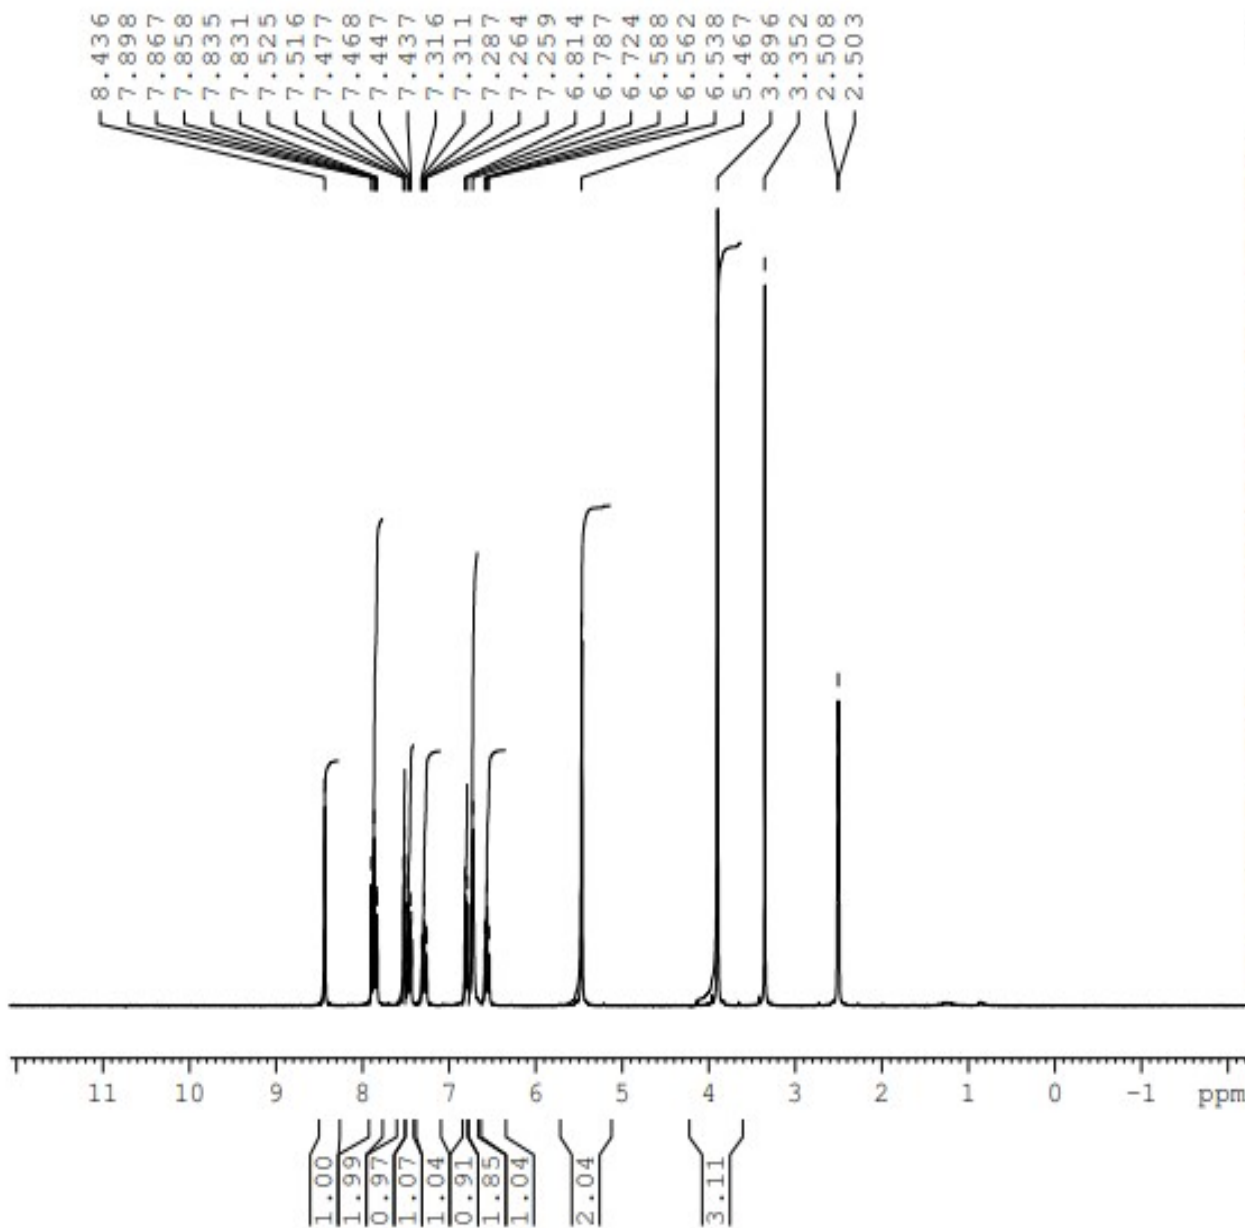

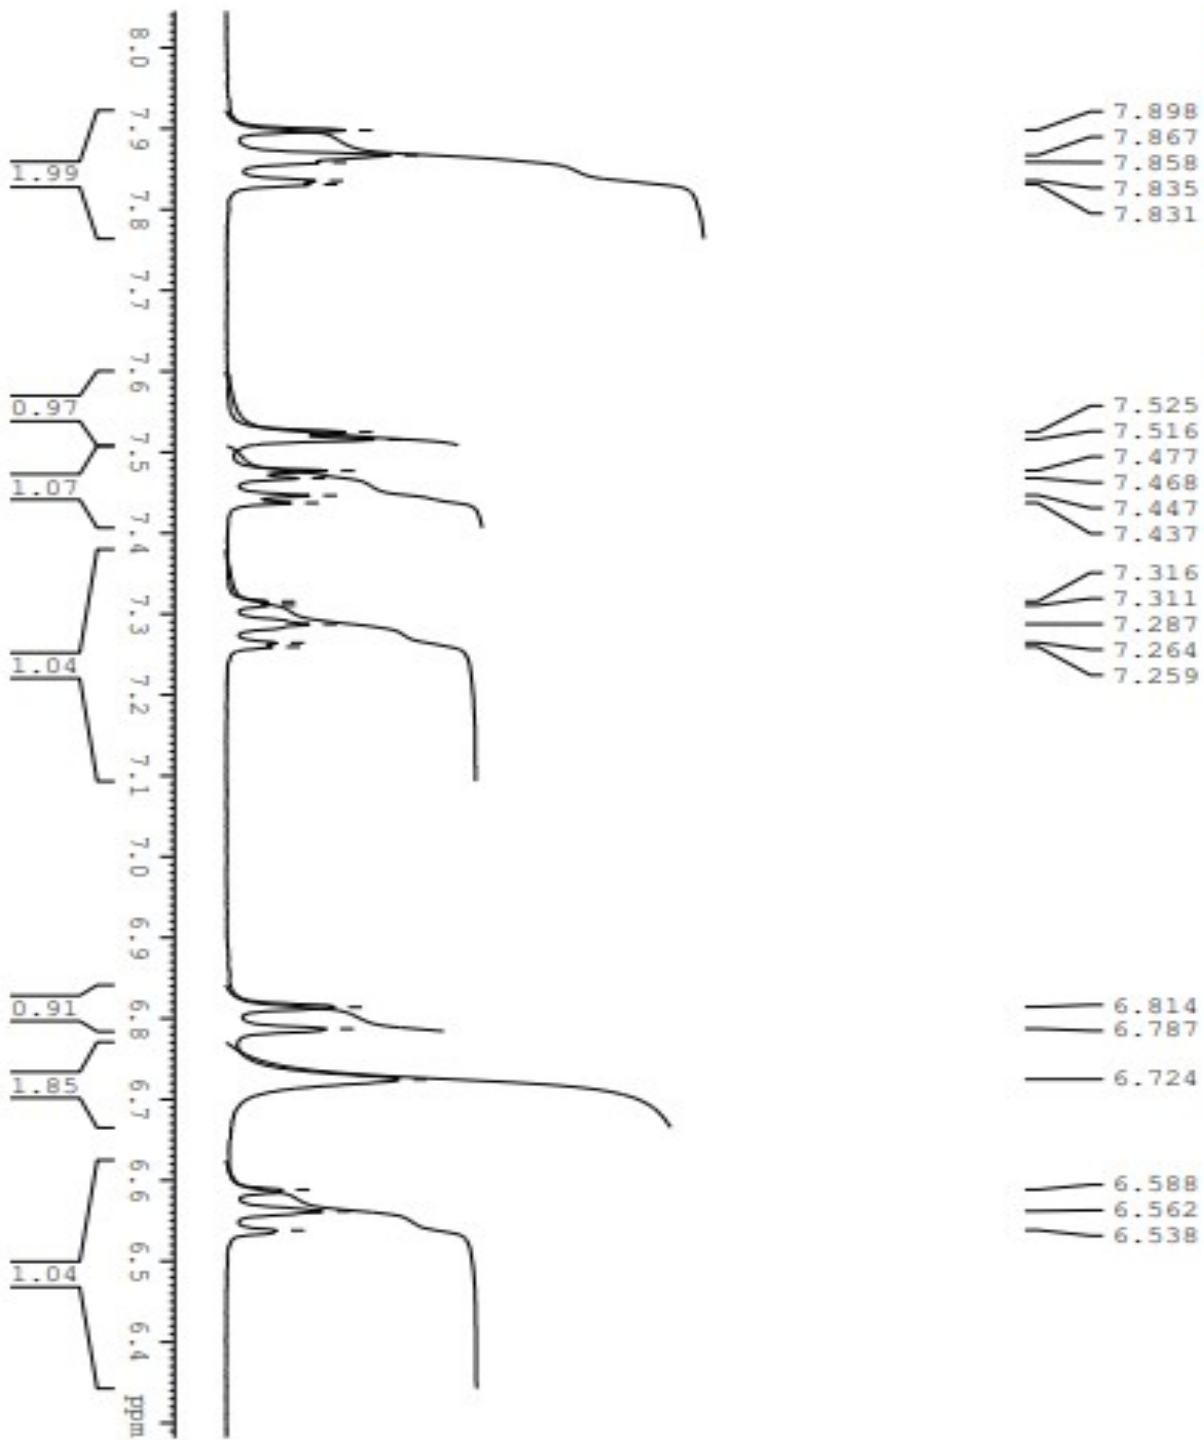

5.18  $^{13}\text{C}$  NMR (75 MHz, DMSO) of (2-chloro-6-methoxyquinolin-3-yl)methyl-2-aminobenzoate (5c)

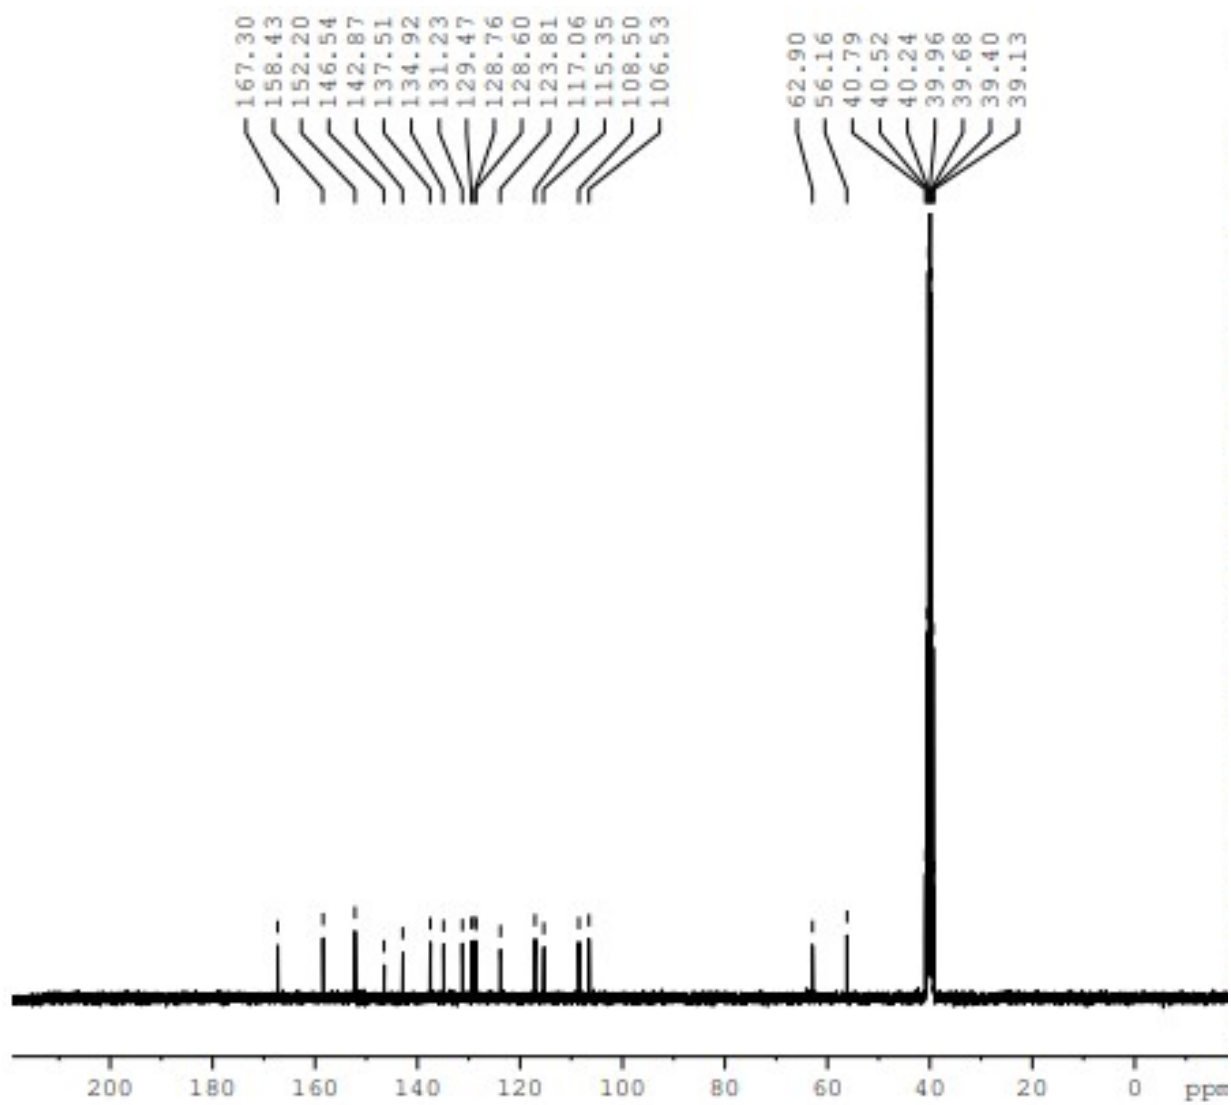

## 6 X-Ray Crystallography Data (XRD)

In quinoline ring the bond lengths of N1-C1 is 1.3094 (64) Å and of N1-C 5 is 1.3678 (59) Å indicating the C=N and C-N bonds (Table S3 and S4).<sup>4,5</sup> The dihedral angle present between the amino benzoic acid and quinoline is 77.923 (13) Å. The root mean square deviations for the quinoline ring (C1/C2/C3/C4/C5/C6/C7/C8/C9/N1) system is 0.0129(41) Å, while the C18-atom of methyl group and C11 (chloro group) is away by 0.0456(92) Å and 0.0051(51) Å from the mean plane of fitted atoms of quinoline. The ester group (O1/O2/C10/C11) is deviating by 2.074(37) Å and 75.860(19) Å with the amino benzene and quinoline rings. The root mean square deviations for the aminobenzene ring (C12/C13/C14/C15/C16/C17) system is 0.0022(35) Å, while the C11-atom of methyl ester group and N2 (amino group) is away by 0.0500(51) Å and -0.0214(79) Å from the mean plane of fitted atoms of aminobenzene.

**Table S3.** Bond Lengths for compound **5b**

| Atom | Atom | Length/Å | Atom | Atom | Length/Å |
|------|------|----------|------|------|----------|
| C1   | N1   | 1.309(6) | C8   | C18  | 1.514(7) |
| C1   | C2   | 1.415(7) | C10  | O2   | 1.449(6) |
| C1   | C11  | 1.747(5) | C11  | O1   | 1.213(5) |
| C2   | C3   | 1.354(7) | C11  | O2   | 1.354(5) |
| C2   | C10  | 1.500(7) | C11  | C12  | 1.461(6) |
| C3   | C4   | 1.417(7) | C12  | C13  | 1.398(6) |
| C4   | C5   | 1.401(6) | C12  | C17  | 1.417(6) |
| C4   | C9   | 1.411(6) | C13  | C14  | 1.367(7) |
| C5   | N1   | 1.368(6) | C14  | C15  | 1.371(7) |
| C5   | C6   | 1.398(7) | C15  | C16  | 1.369(8) |
| C6   | C7   | 1.355(7) | C16  | C17  | 1.393(7) |
| C7   | C8   | 1.404(8) | C17  | N2   | 1.354(6) |
| C8   | C9   | 1.367(7) |      |      |          |

**Table S4.** Bond Angles for compound **5b**

| Atom | Atom | Atom | Angle/°  | Atom | Atom | Atom | Angle/°  |
|------|------|------|----------|------|------|------|----------|
| N1   | C1   | C2   | 126.1(4) | C8   | C9   | C4   | 121.6(5) |
| N1   | C1   | C11  | 115.8(4) | O2   | C10  | C2   | 106.6(4) |
| C2   | C1   | C11  | 118.0(4) | O1   | C11  | O2   | 121.6(4) |
| C3   | C2   | C1   | 116.0(5) | O1   | C11  | C12  | 126.6(4) |
| C3   | C2   | C10  | 122.5(5) | O2   | C11  | C12  | 111.8(4) |
| C1   | C2   | C10  | 121.4(5) | C13  | C12  | C17  | 119.1(4) |
| C2   | C3   | C4   | 121.1(5) | C13  | C12  | C11  | 120.5(4) |
| C5   | C4   | C9   | 118.7(4) | C17  | C12  | C11  | 120.3(4) |

| Atom | Atom | Atom | Angle/°  | Atom | Atom | Atom | Angle/°  |
|------|------|------|----------|------|------|------|----------|
| C5   | C4   | C3   | 117.6(4) | C14  | C13  | C12  | 122.2(5) |
| C9   | C4   | C3   | 123.7(5) | C13  | C14  | C15  | 118.2(5) |
| N1   | C5   | C6   | 118.5(4) | C16  | C15  | C14  | 121.7(5) |
| N1   | C5   | C4   | 122.1(4) | C15  | C16  | C17  | 121.4(5) |
| C6   | C5   | C4   | 119.4(4) | N2   | C17  | C16  | 119.7(5) |
| C7   | C6   | C5   | 120.3(5) | N2   | C17  | C12  | 122.9(5) |
| C6   | C7   | C8   | 121.8(5) | C16  | C17  | C12  | 117.4(5) |
| C9   | C8   | C7   | 118.2(5) | C1   | N1   | C5   | 117.0(4) |
| C9   | C8   | C18  | 121.0(5) | C11  | O2   | C10  | 115.1(4) |
| C7   | C8   | C18  | 120.8(5) |      |      |      |          |

## 7 References

1. Kady IO. Microscale Electrophilic Aromatic Substitution of p-Toluidine. *J Chem Educ.* 1995; 72(1):A9. <https://doi.org/10.1021/ed072pa9>
2. Redasani VK, Kumawat VS, Kabra RP, Kansagara P, Surana SJ. Applications of green chemistry in organic synthesis. *Int. J. Chemtech Res.* 2010 Jul;2(3):1856-9.
3. Meth-Cohn O, Narine B, Tarnowski B. A versatile new synthesis of quinolines and related fused pyridines, Part 5. The synthesis of 2-chloroquinoline-3-carbaldehydes. *J. Chem. Soc., Perkin Trans. 1.* 1981:1520-1530. <https://doi.org/10.1039/P19810001520>
4. Khalid M, Arshad MN, Tahir MN, Asiri AM, Naseer MM, Ishaq M, Khan MU, Shafiq Z. An efficient synthesis, structural (SC-XRD) and spectroscopic (FTIR, <sup>1</sup>HNMR, MS spectroscopic) characterization of novel benzofuran-based hydrazones: An experimental and theoretical studies. *J. Mol. Struct.* 2020;1216:128318. <https://doi.org/10.1016/j.molstruc.2020.128318>
5. Ahmed M, Qadir MA, Hameed A, Arshad MN, Asiri AM, Muddassar M. Azomethines, isoxazole, N-substituted pyrazoles and pyrimidine containing curcumin derivatives: Urease inhibition and molecular modeling studies. *Biochem. Biophys. Res. Commun.* 2017;490(2):434-440. <https://doi.org/10.1016/j.bbrc.2017.06.059>
